# Supplementary material for: Rapamycin rescues mitochondrial myopathy via coordinated activation of autophagy and lysosomal biogenesis
Source: PubMed Central journal article supplement (PMC6220341; doi:10.15252/emmm.201708799), 2018-10-11
Supplement: EMMM-10-e8799-s001.pdf [file EMMM-10-e8799-s001.pdf]

## **Appendix**

**Appendix Figure S1**

**Appendix Figure S2**

**Appendix Figure S3**

**Appendix Figure S4**

**Appendix Figure S5**

**Appendix Figure S6**

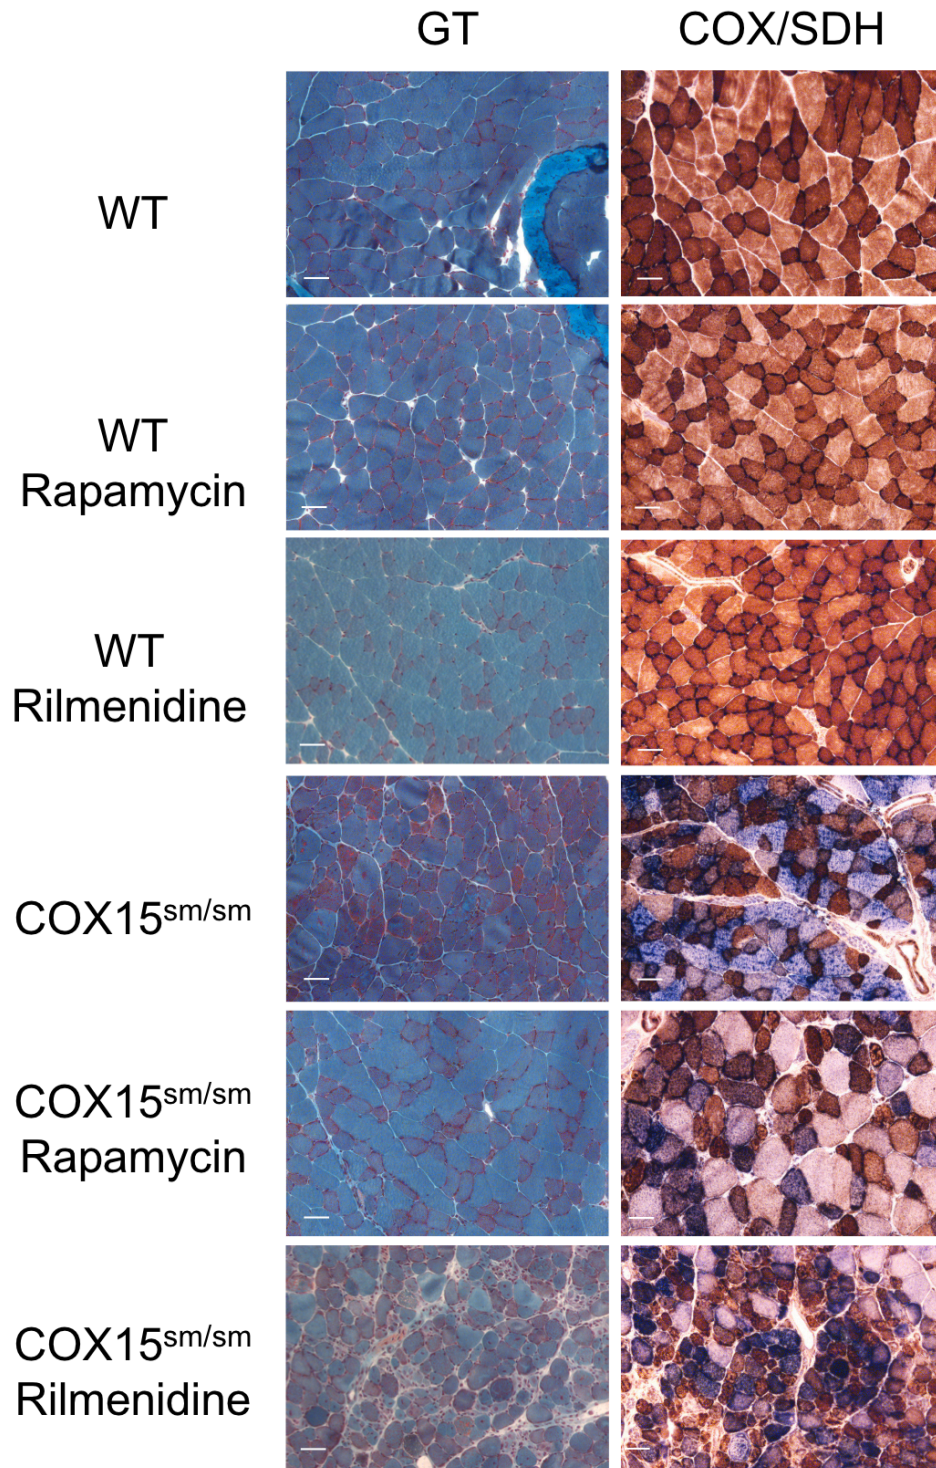

**Appendix Figure S1. Histological and histochemical characterization of skeletal muscle in rapamycin-treated and untreated *Cox15<sup>sm/sm</sup>* and *WT* mice.**

**GT:** Gomori trichrome. **COX/SDH:** double histochemical staining for COX and SDH.

White bars correspond to 50 $\mu$ m.

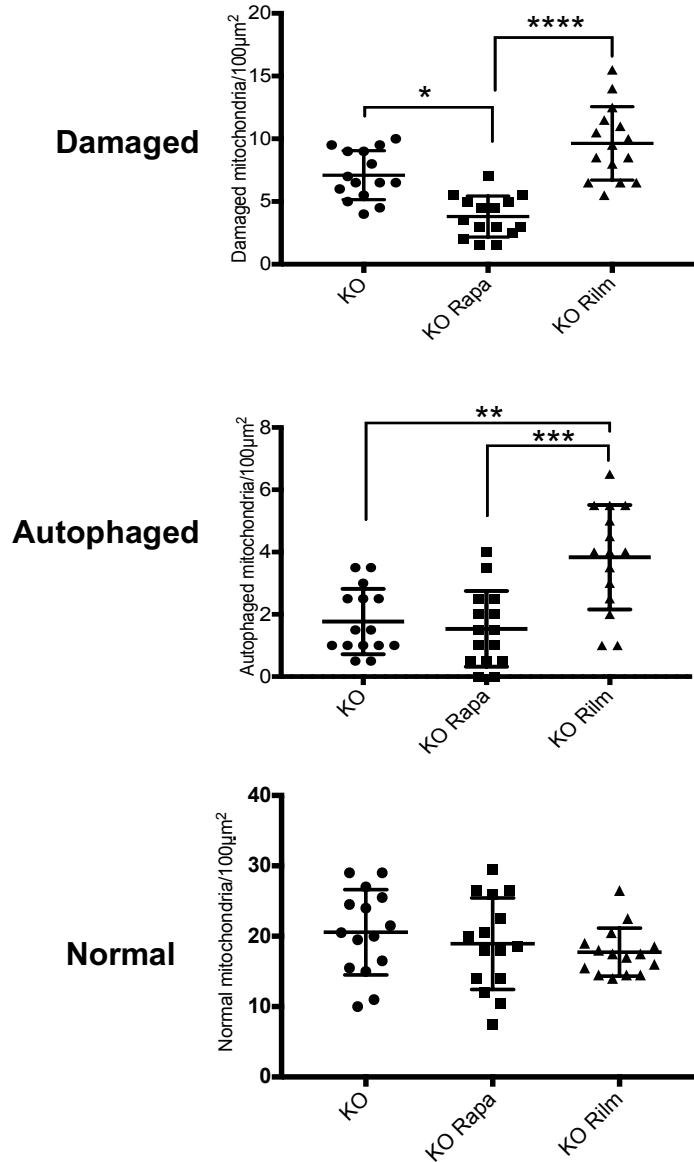

**Appendix Figure S2. Quantification of damaged, autophaged and normal mitochondria in muscle samples.**

Ten independent, low magnification fields for a total area of 855µm<sup>2</sup> were analyzed in 2 animals/group. Error bars represent SEM. The asterisks represent the significance levels calculated by two-way ANOVA with Tukey post-hoc multiple comparison test: Damaged mitochondria: \*p=0.0123 (KO vs KO+rapa), \*\*\*\*p<0.0001 (KO+rapa vs KO+rilmenedine); Autophaged mitochondria: \*\*p=0.0012 (KO vs KO+rilmenedine), \*\*\*=0.0003 (KO vs KO+rapa).

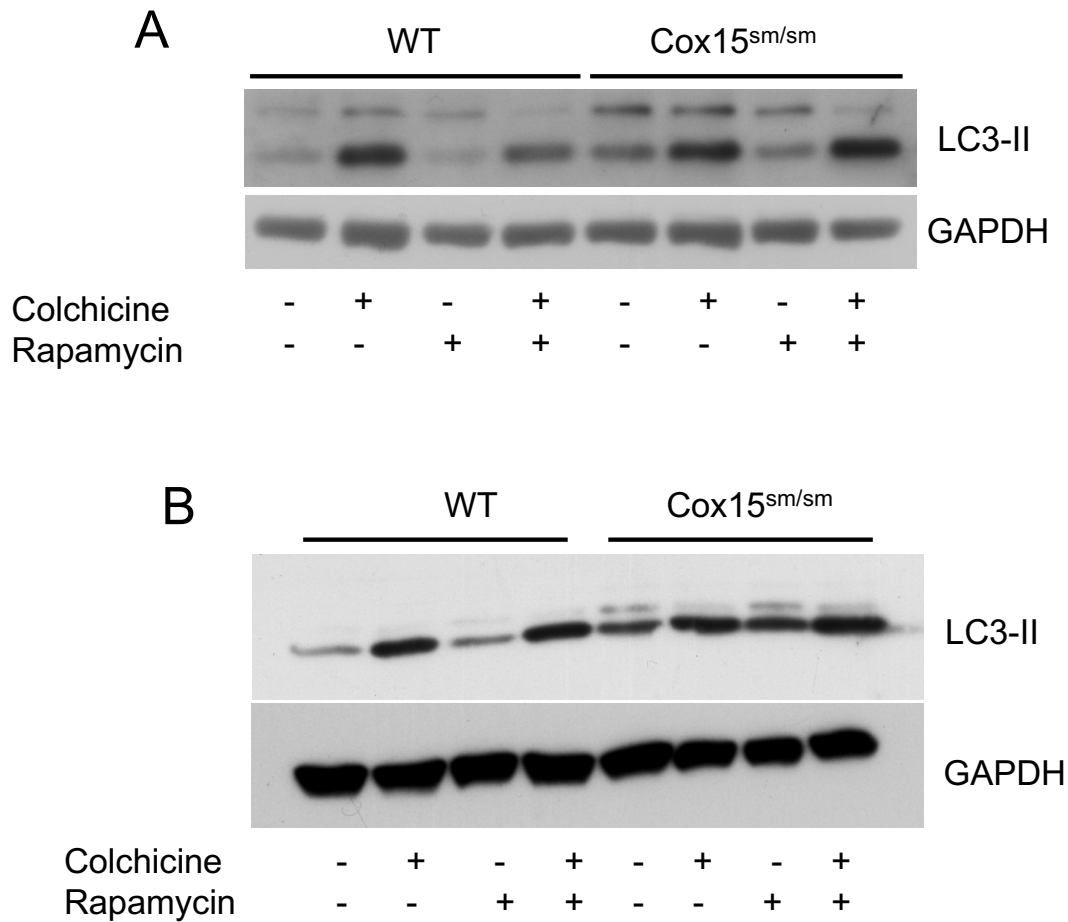

**Appendix Figure S3. Additional WB analysis of autophagic flux.**

Two additional western blot of *Cox15<sup>sm/sm</sup>* and WT muscles treated with colchicine, rapamycin, or rapamycin plus colchicine. Note that LC3-II was increased in *Cox15<sup>sm/sm</sup>* vs. WT samples. Colchicine did not increase LC3-II levels suggesting a block in the autophagic flux; rapamycin plus colchicine treated *Cox15<sup>sm/sm</sup>* mice showed higher levels of LC3-II, suggesting that rapamycin increased the autophagic flux in *Cox15<sup>sm/sm</sup>* muscles. Quantitative analysis is reported in figure 4C.

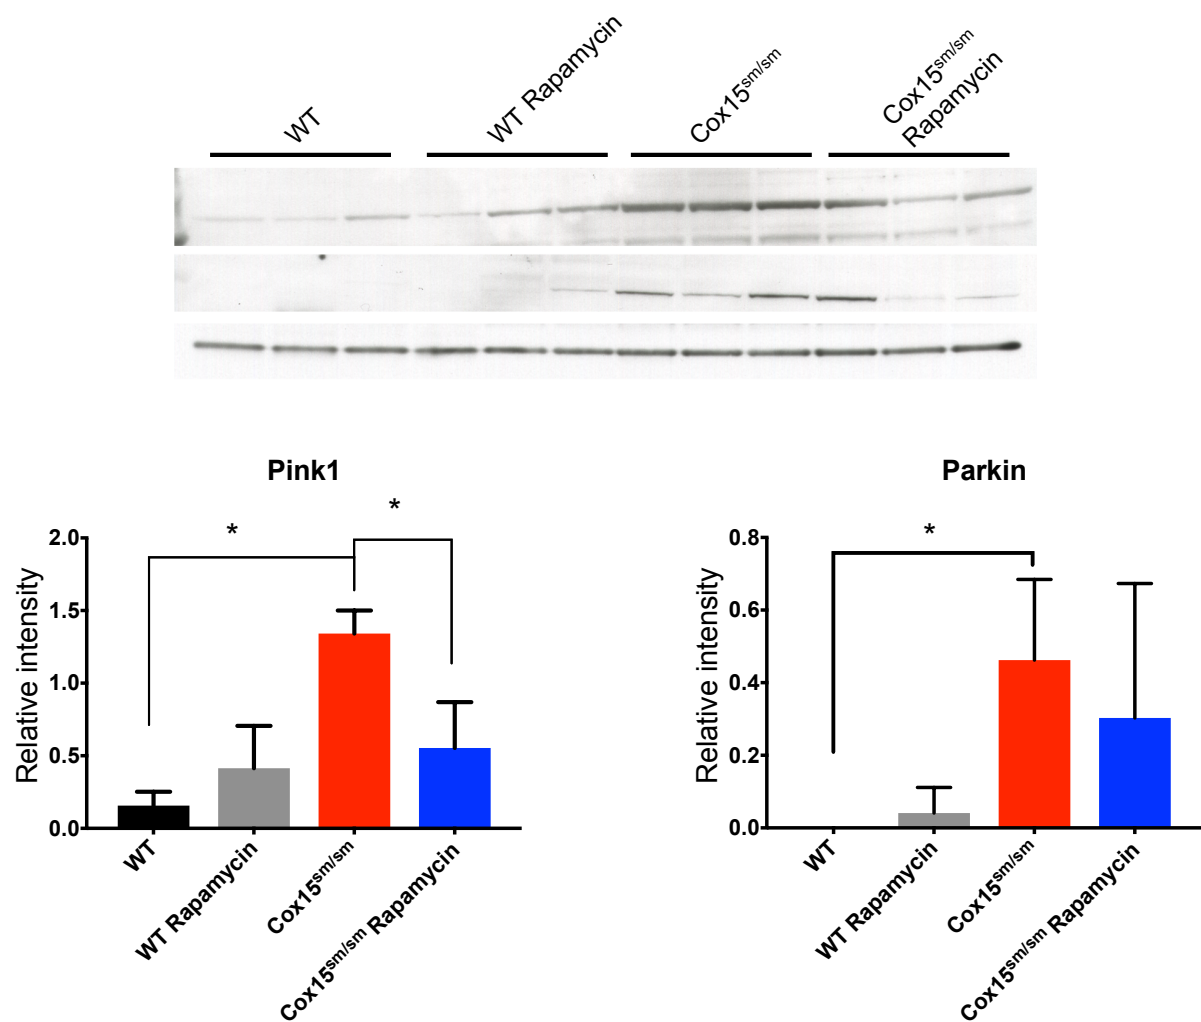

**Appendix Figure S4. WB analysis of PINK1 and Parkin.**

Black: untreated *WT*; grey: rapamycin-treated *WT*; red: untreated *Cox15<sup>sm/sm</sup>*; blue: rapamycin-treated *Cox15<sup>sm/sm</sup>*. Error bars represent SEM. The asterisks represent the significance levels calculated by one-way ANOVA with Tukey post-hoc multiple comparison test: \* $p=0,0141$  (KO vs KO+rapa); \*\* $p=0.00212$  (WT vs KO); \* $p=0.010$  (WT vs KO), \* $p=0.05$  (KO+rapa vs. KO). N=3/group.

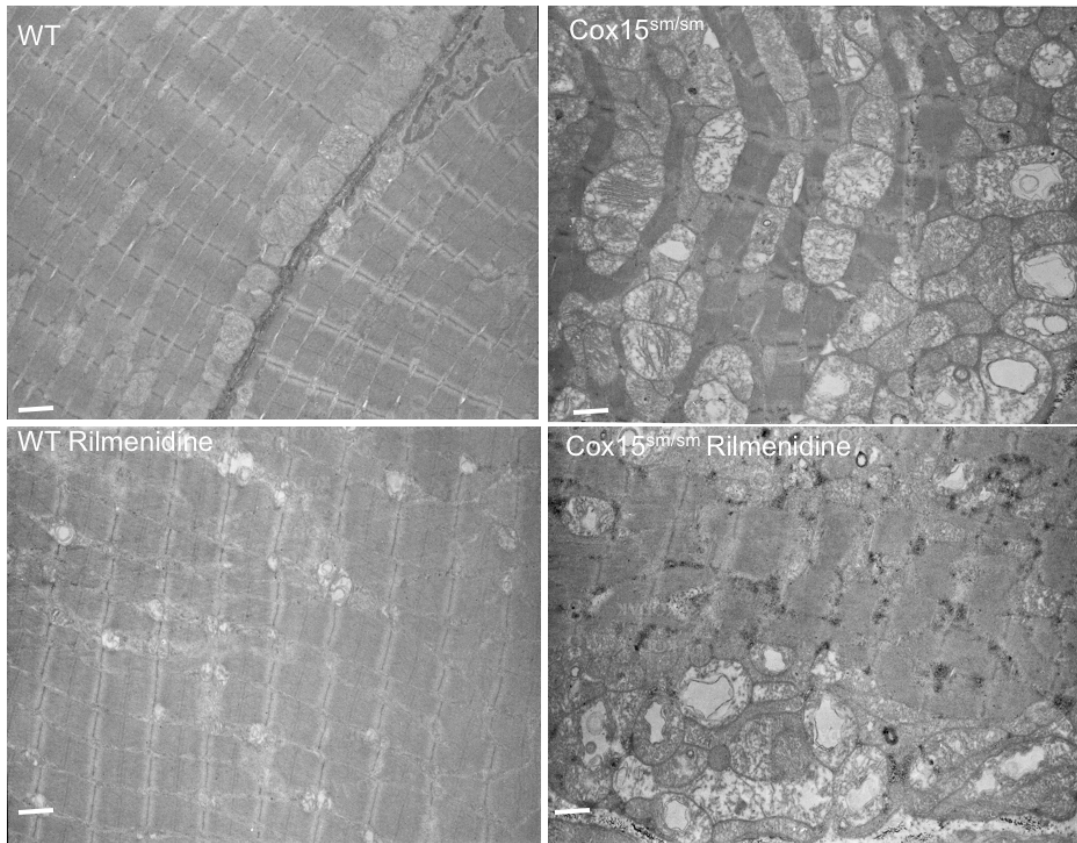

**Appendix Figure S5. Rilmenidine does not improve mitochondrial ultrastructure in *Cox15<sup>sm/sm</sup>* mice.**

Altered mitochondria in *Cox15<sup>sm/sm</sup>* muscles persists in rilmenidine-treated *Cox15<sup>sm/sm</sup>* animals. Notably, several disrupted mitochondria can be detected also in rilmenidine-treated *WT* samples. The bar corresponds to 1136 nm (4400X).

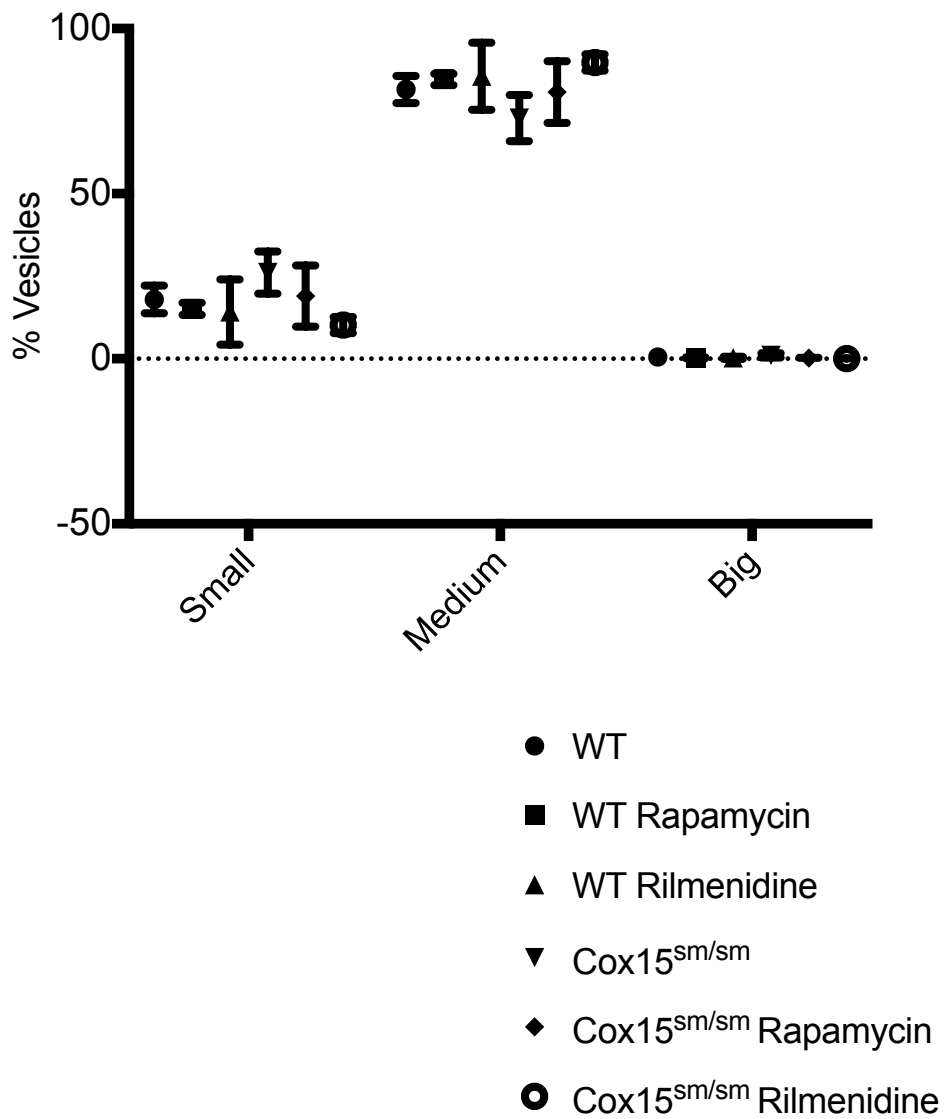

**Appendix Figure S6. Quantification analysis of the size of LAMP1-positive vesicles.** LAMP1 positive vesicles were classified as small if their diameter was  $<0.5\mu\text{m}$ , medium if the diameter was between  $>0.5<1.0\mu\text{m}$ , big if the diameter was  $>1.0\mu\text{m}$
