# Supplementary material for: Rapamycin rescues mitochondrial myopathy via coordinated activation of autophagy and lysosomal biogenesis
Source: PubMed Central journal article supplement (PMC6220341; doi:10.15252/emmm.201708799), 2018-10-11
Supplement: EMMM-10-e8799-s002.pdf [file EMMM-10-e8799-s002.pdf]

Figure 1B



COX KO RAPA

50  $\mu$ m

Figure 1B



Figure 1B



COX WT RAPA

50 μm

Figure 1B



**Figure 1B**



H&E KO RAPA

50  $\mu$ m

Figure 1B



H&E KO UTR

50 μm

**Figure 1B**



H&E WT RAPA

50  $\mu$ m

**Figure 1B**



H&E WT UTR

50  $\mu\text{m}$

Figure 1B



PAS KO RAPA

50 μm

Figure 1B



Figure 1B



PAS WT RAPA

Figure 1B



PAS WT UTR

50  $\mu$ m

**Figure 1B**



**Figure 1B**



SDH KO UTR

50  $\mu$ m

**Figure 1B**



**Figure 1B**
