# Supplementary material for: Rapamycin rescues mitochondrial myopathy via coordinated activation of autophagy and lysosomal biogenesis
Source: PubMed Central journal article supplement (PMC6220341; doi:10.15252/emmm.201708799), 2018-10-11

OxPhos Mix-low exposure

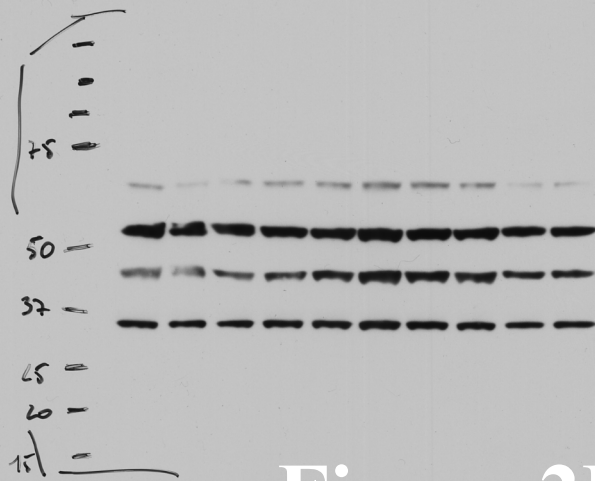

Figure 2B

OxPhos Mix-High Exposure-CoxIV

# Figure 2B

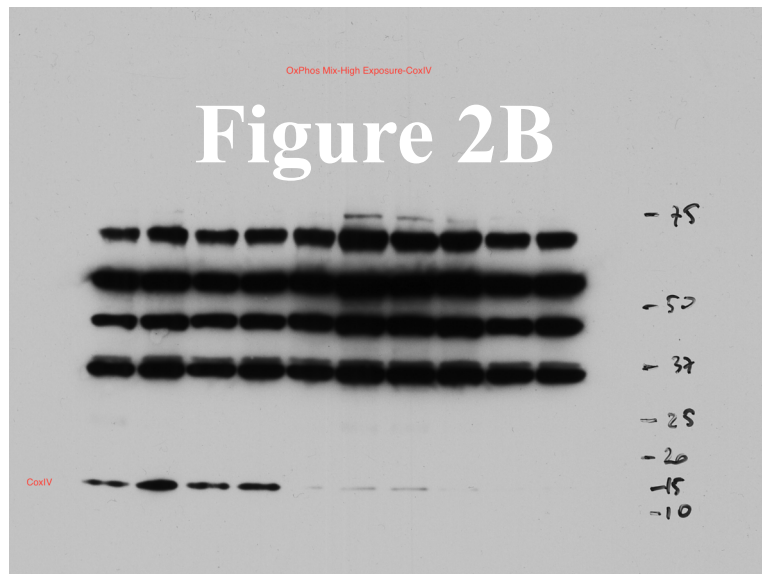

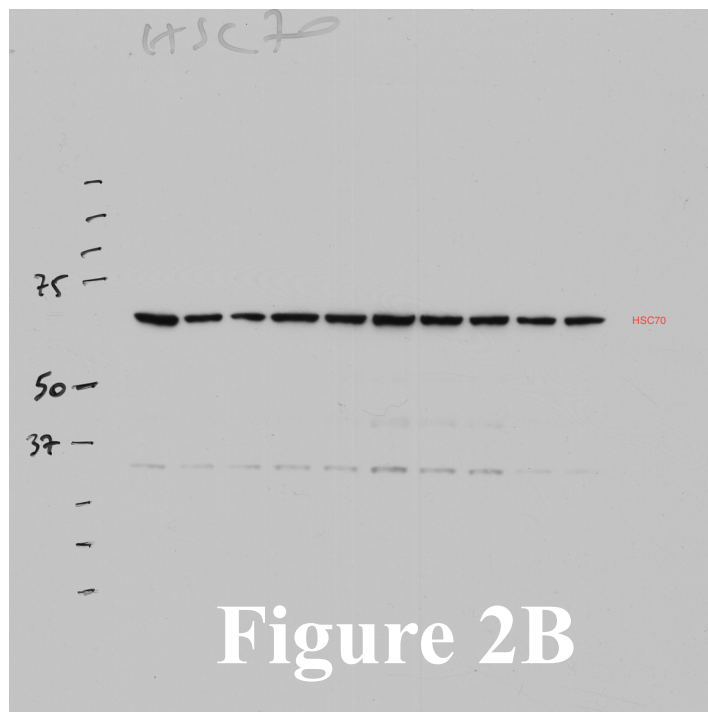

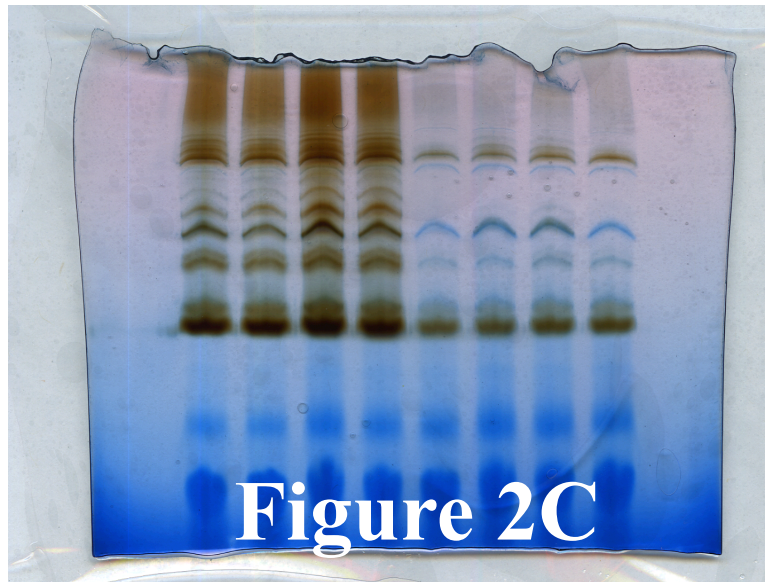



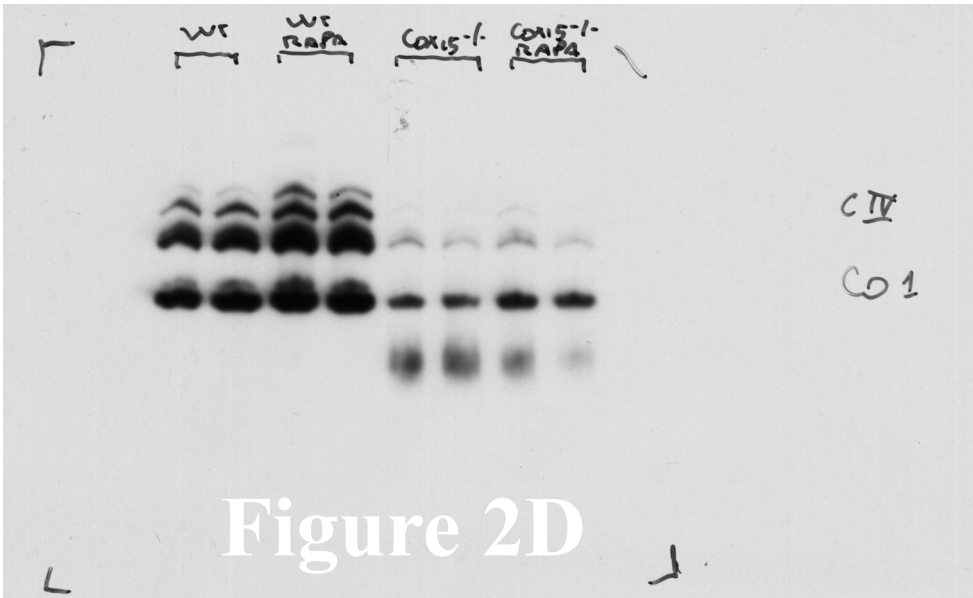

Supplement: EMMM-10-e8799-s003.pdf [file EMMM-10-e8799-s003.pdf]
