# Supplementary material for: Rapamycin rescues mitochondrial myopathy via coordinated activation of autophagy and lysosomal biogenesis
Source: PubMed Central journal article supplement (PMC6220341; doi:10.15252/emmm.201708799), 2018-10-11

S6 and P-S6 Figure 4A

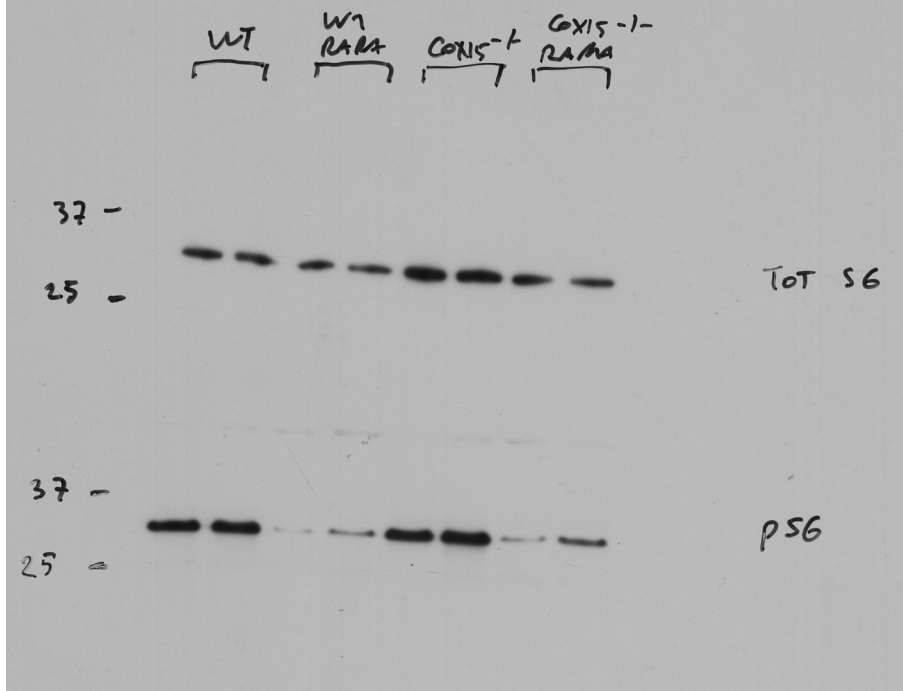

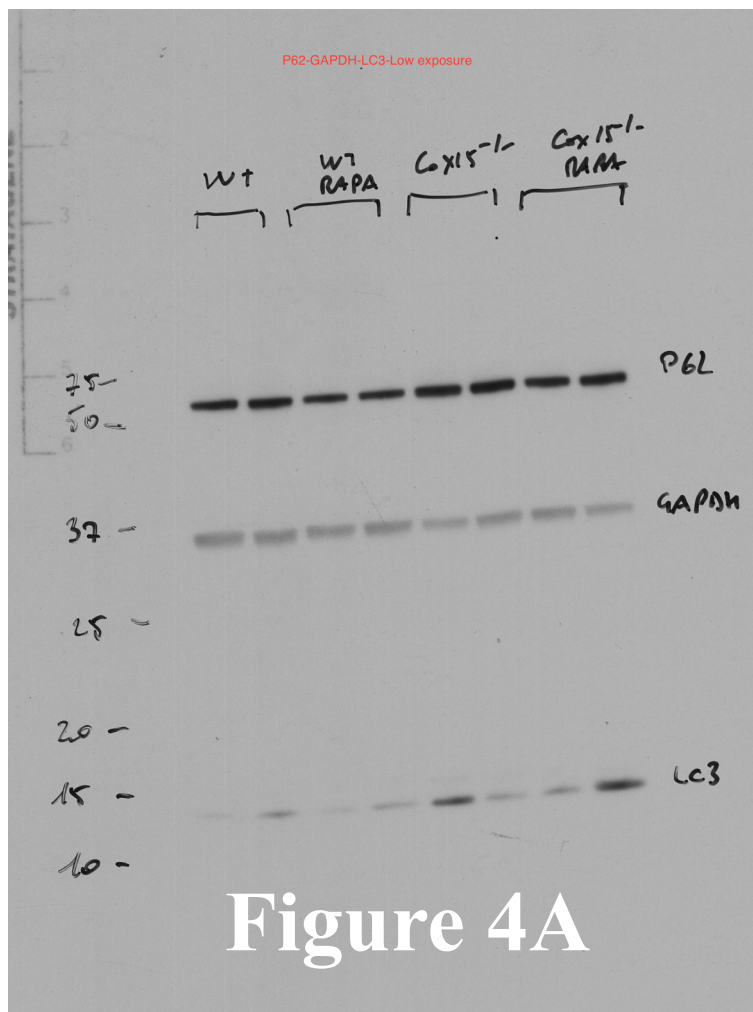

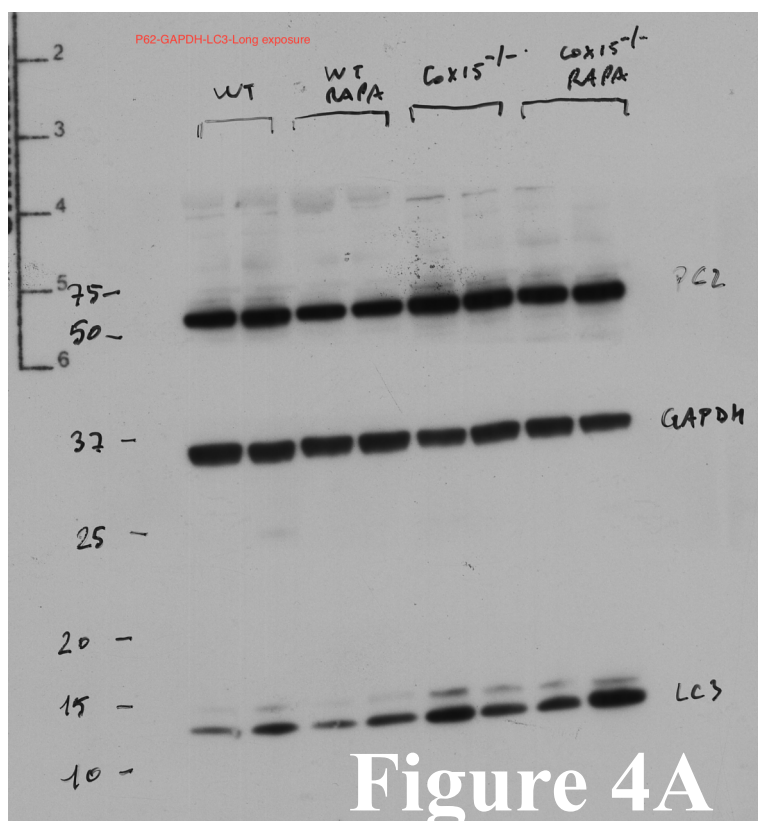

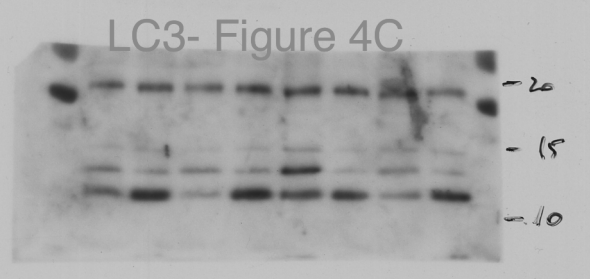

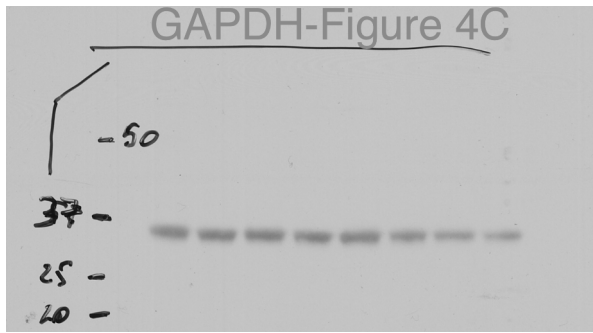

Supplement: EMMM-10-e8799-s004.pdf [file EMMM-10-e8799-s004.pdf]
