# Supplementary material for: Rapamycin rescues mitochondrial myopathy via coordinated activation of autophagy and lysosomal biogenesis
Source: PubMed Central journal article supplement (PMC6220341; doi:10.15252/emmm.201708799), 2018-10-11
Supplement: EMMM-10-e8799-s005.pdf [file EMMM-10-e8799-s005.pdf]

# Figure 5A

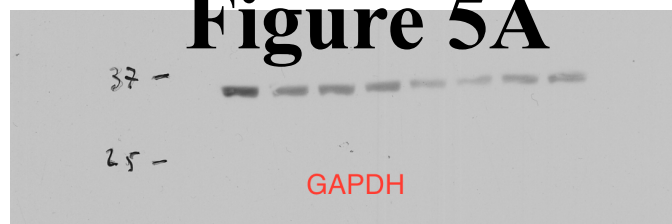

# Figure 5A

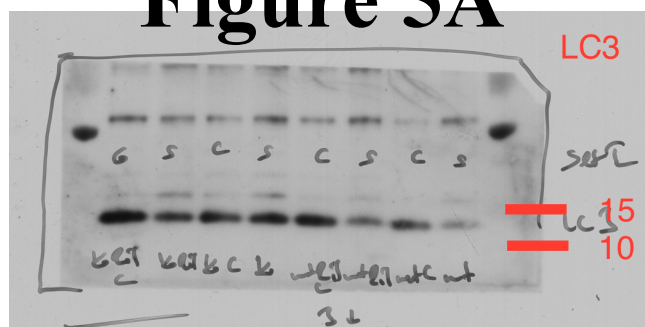



Figure 5C

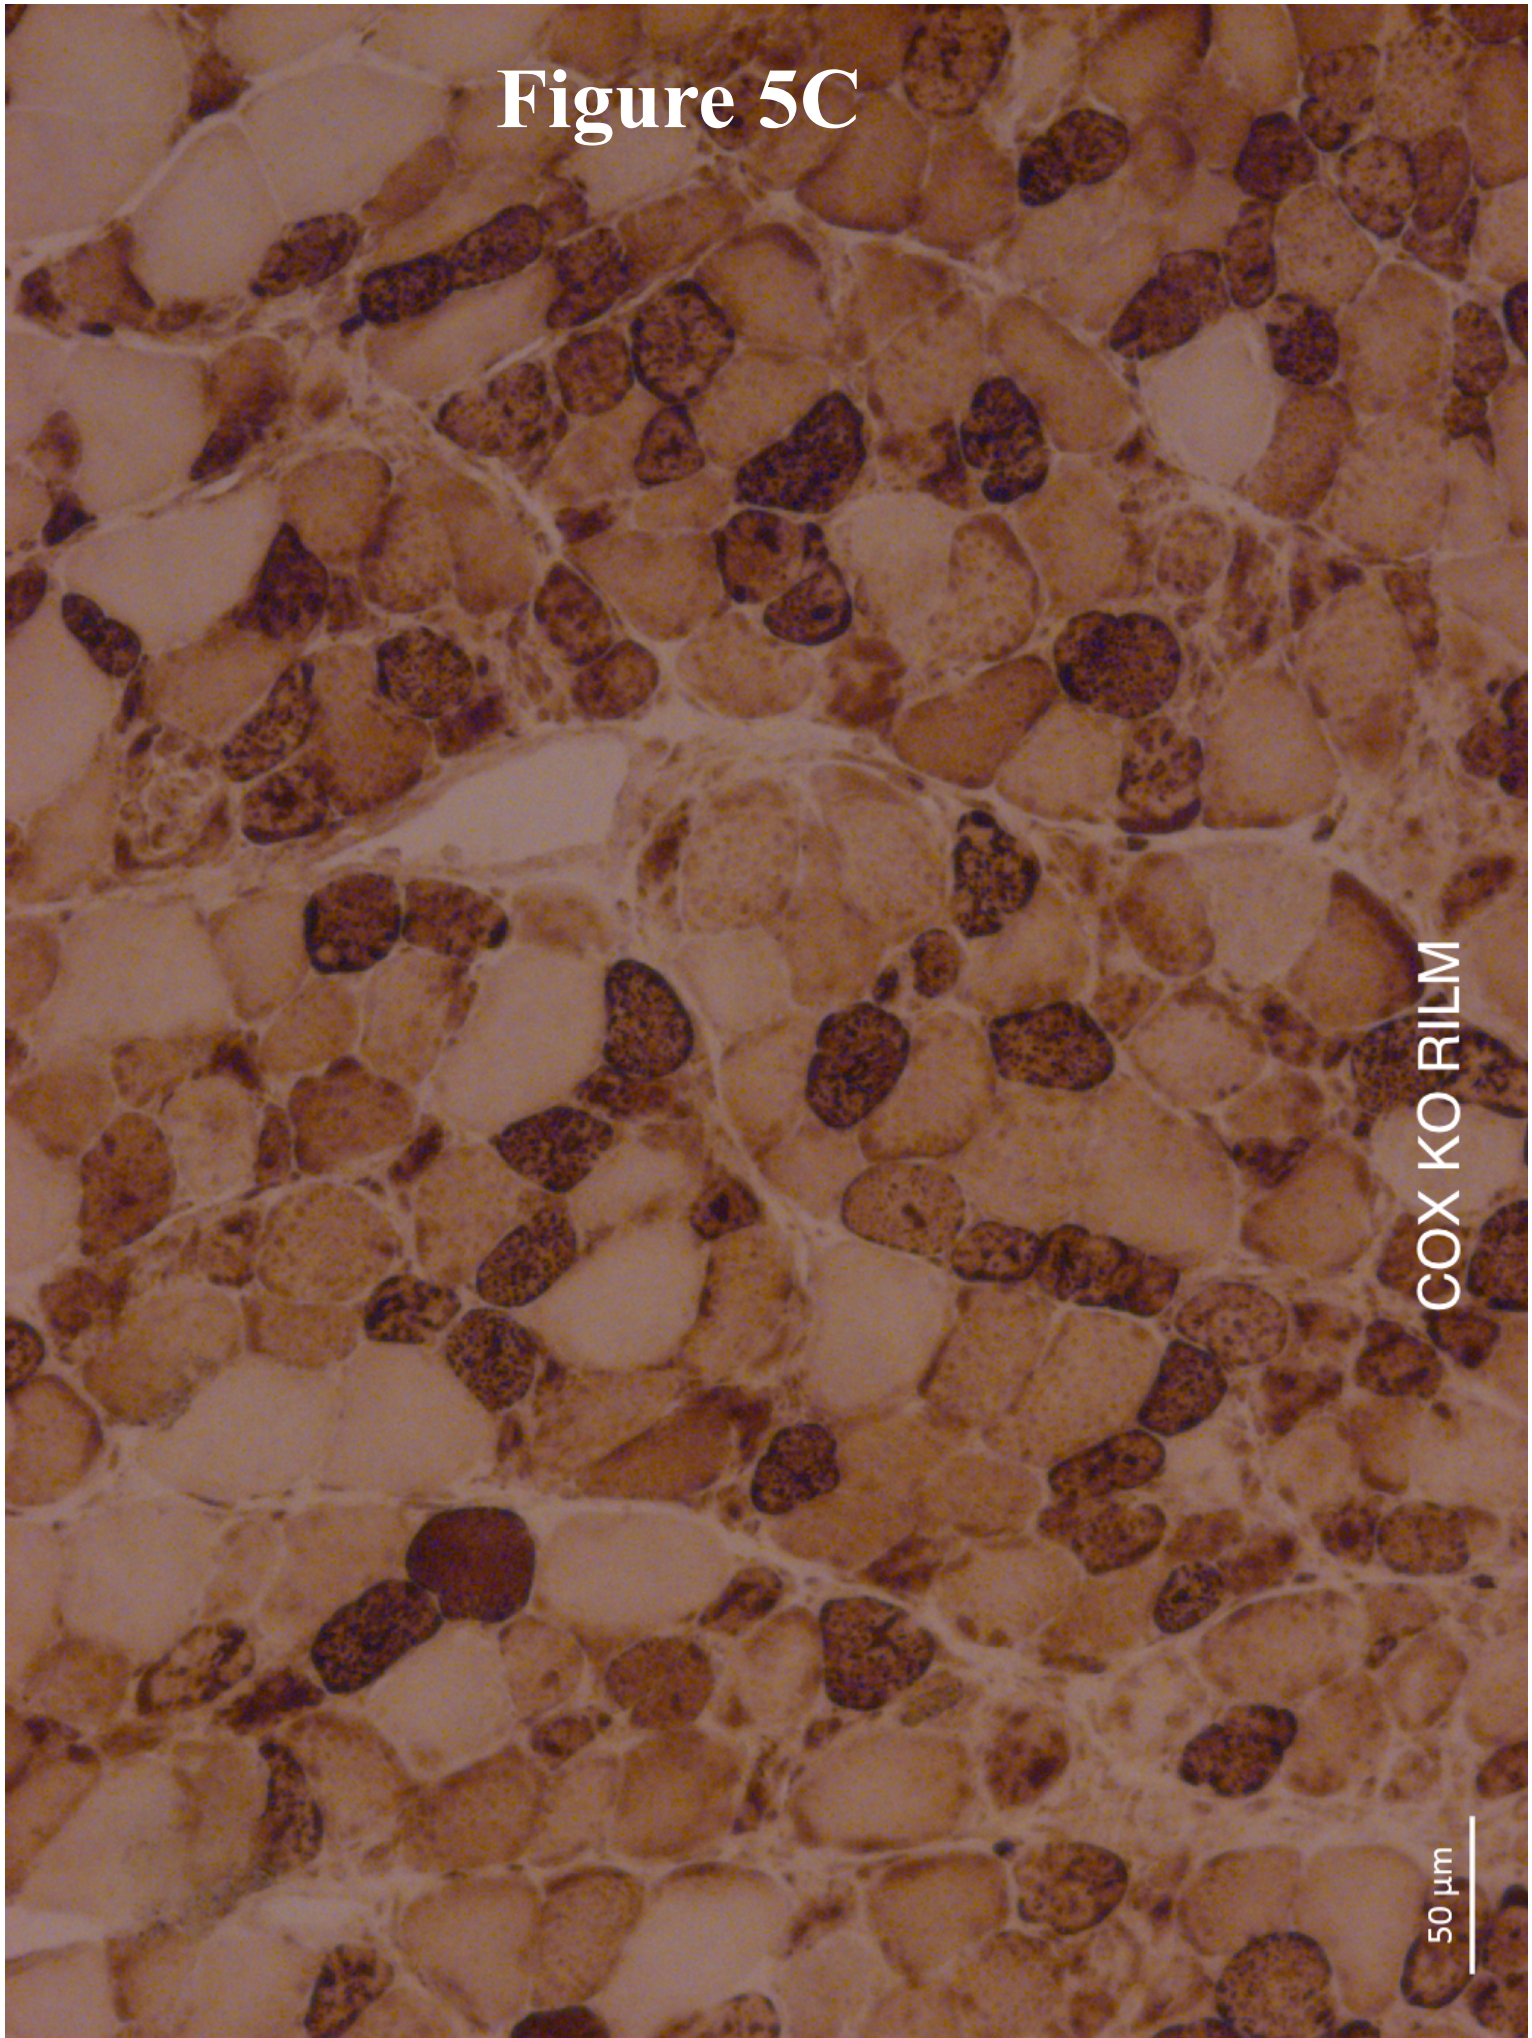

COX KO RILM

50  $\mu$ m



Figure 5C

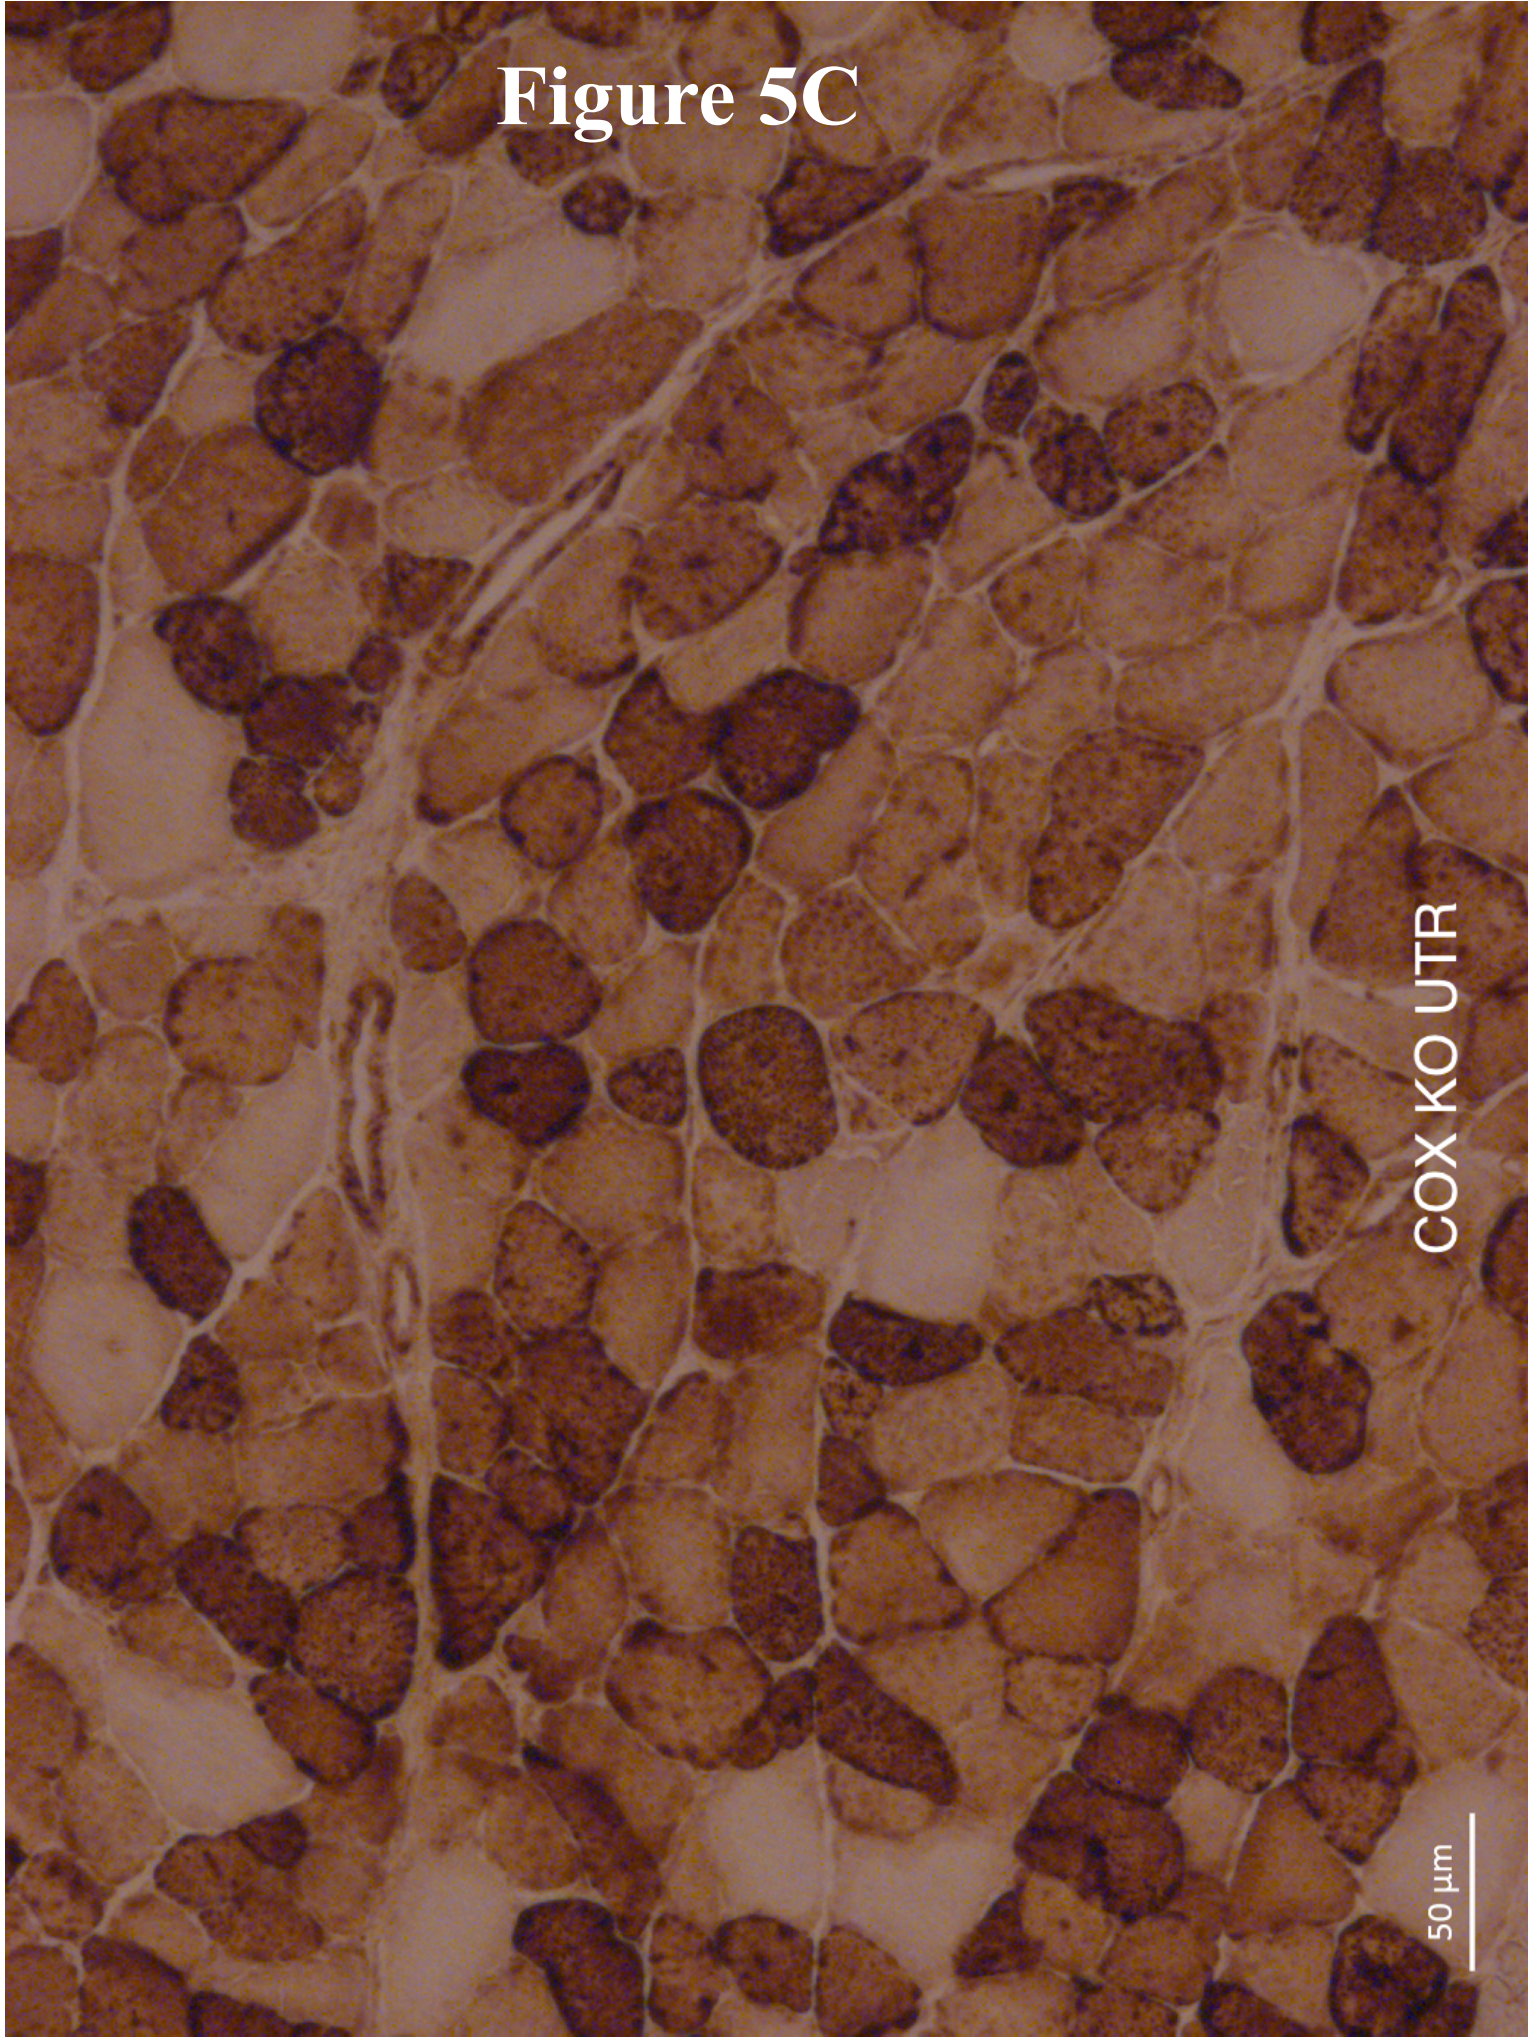

COX KO UTR

50  $\mu$ m



**Figure 5C**

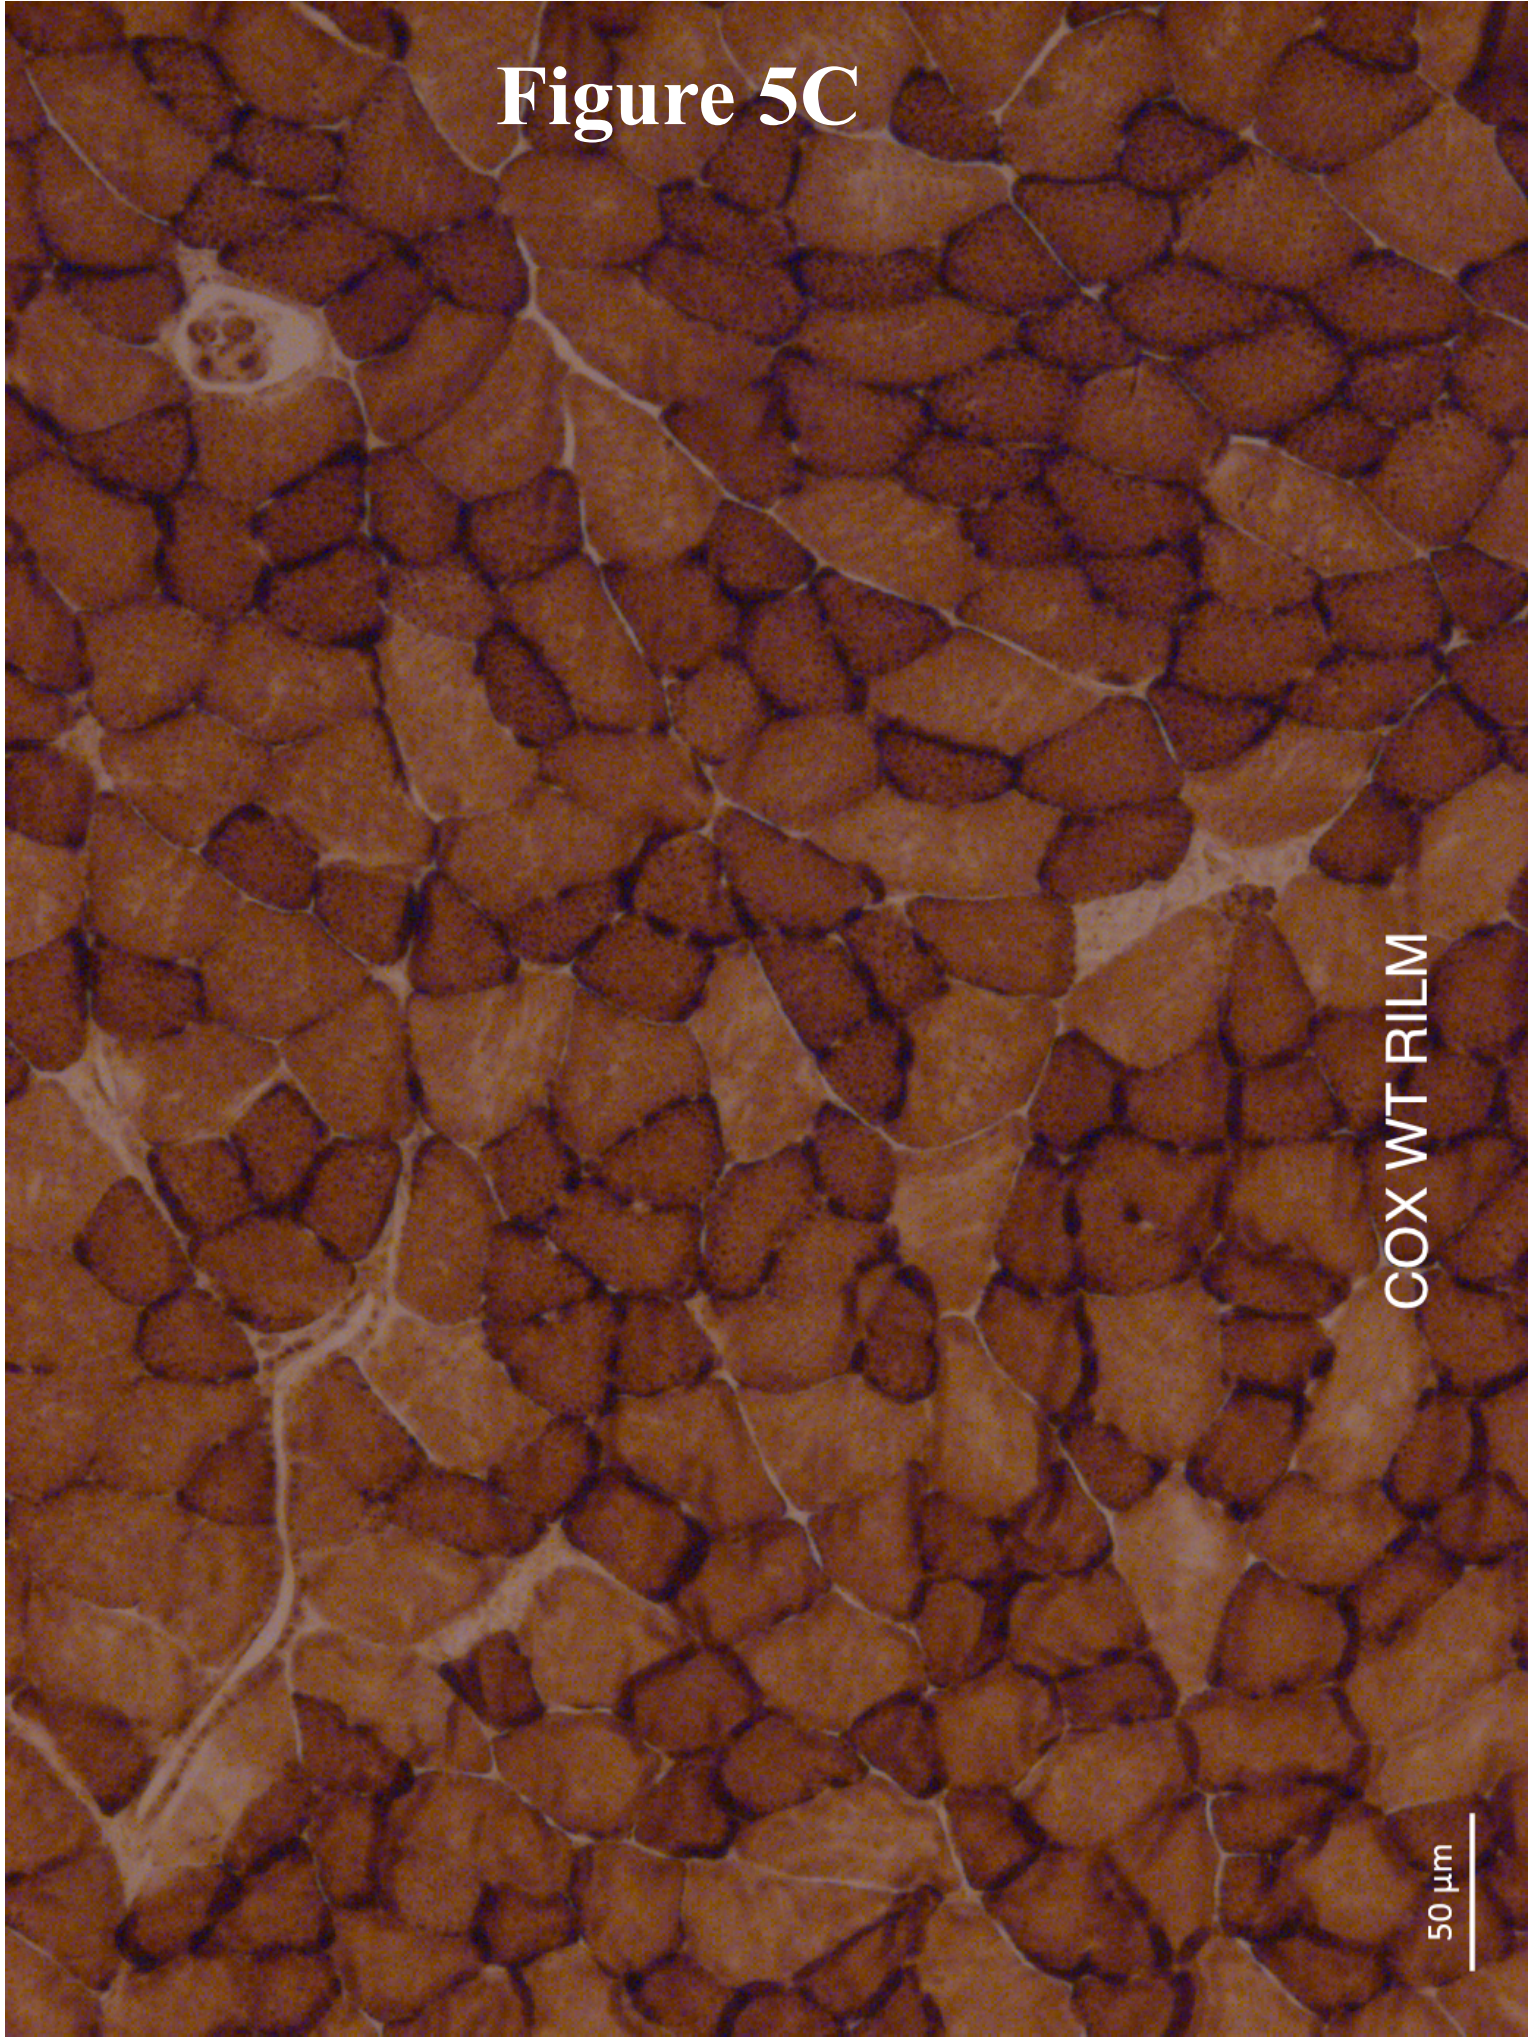

COX WT RILM

50  $\mu$ m



**Figure 5C**

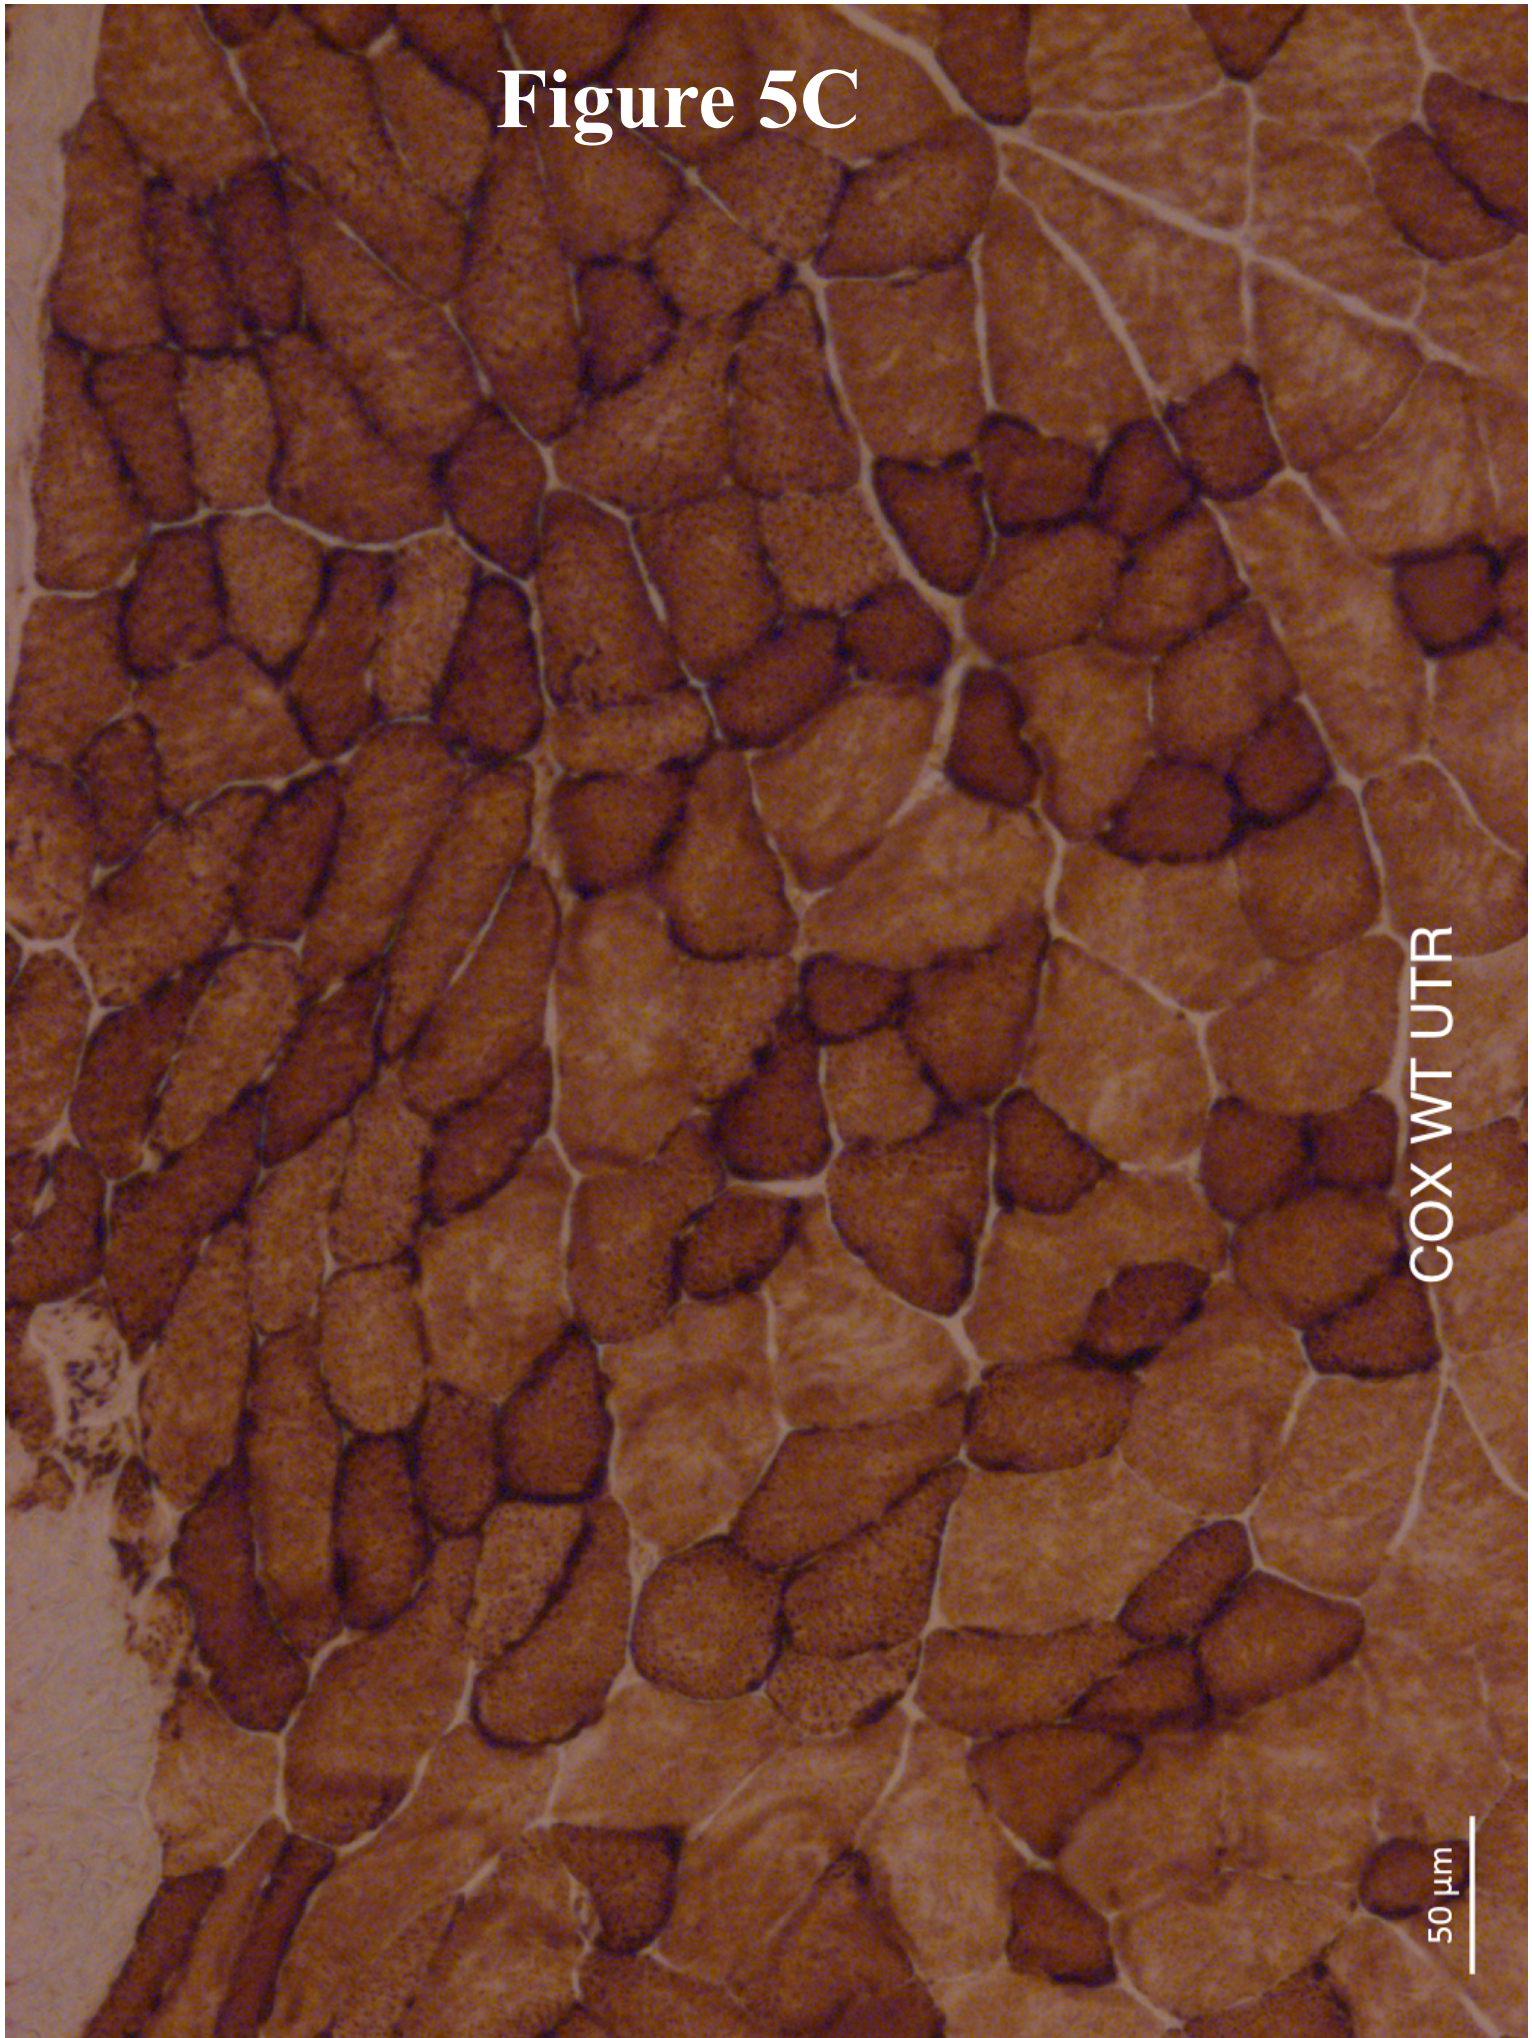

COX WT UTR

50  $\mu$ m



Figure 5C

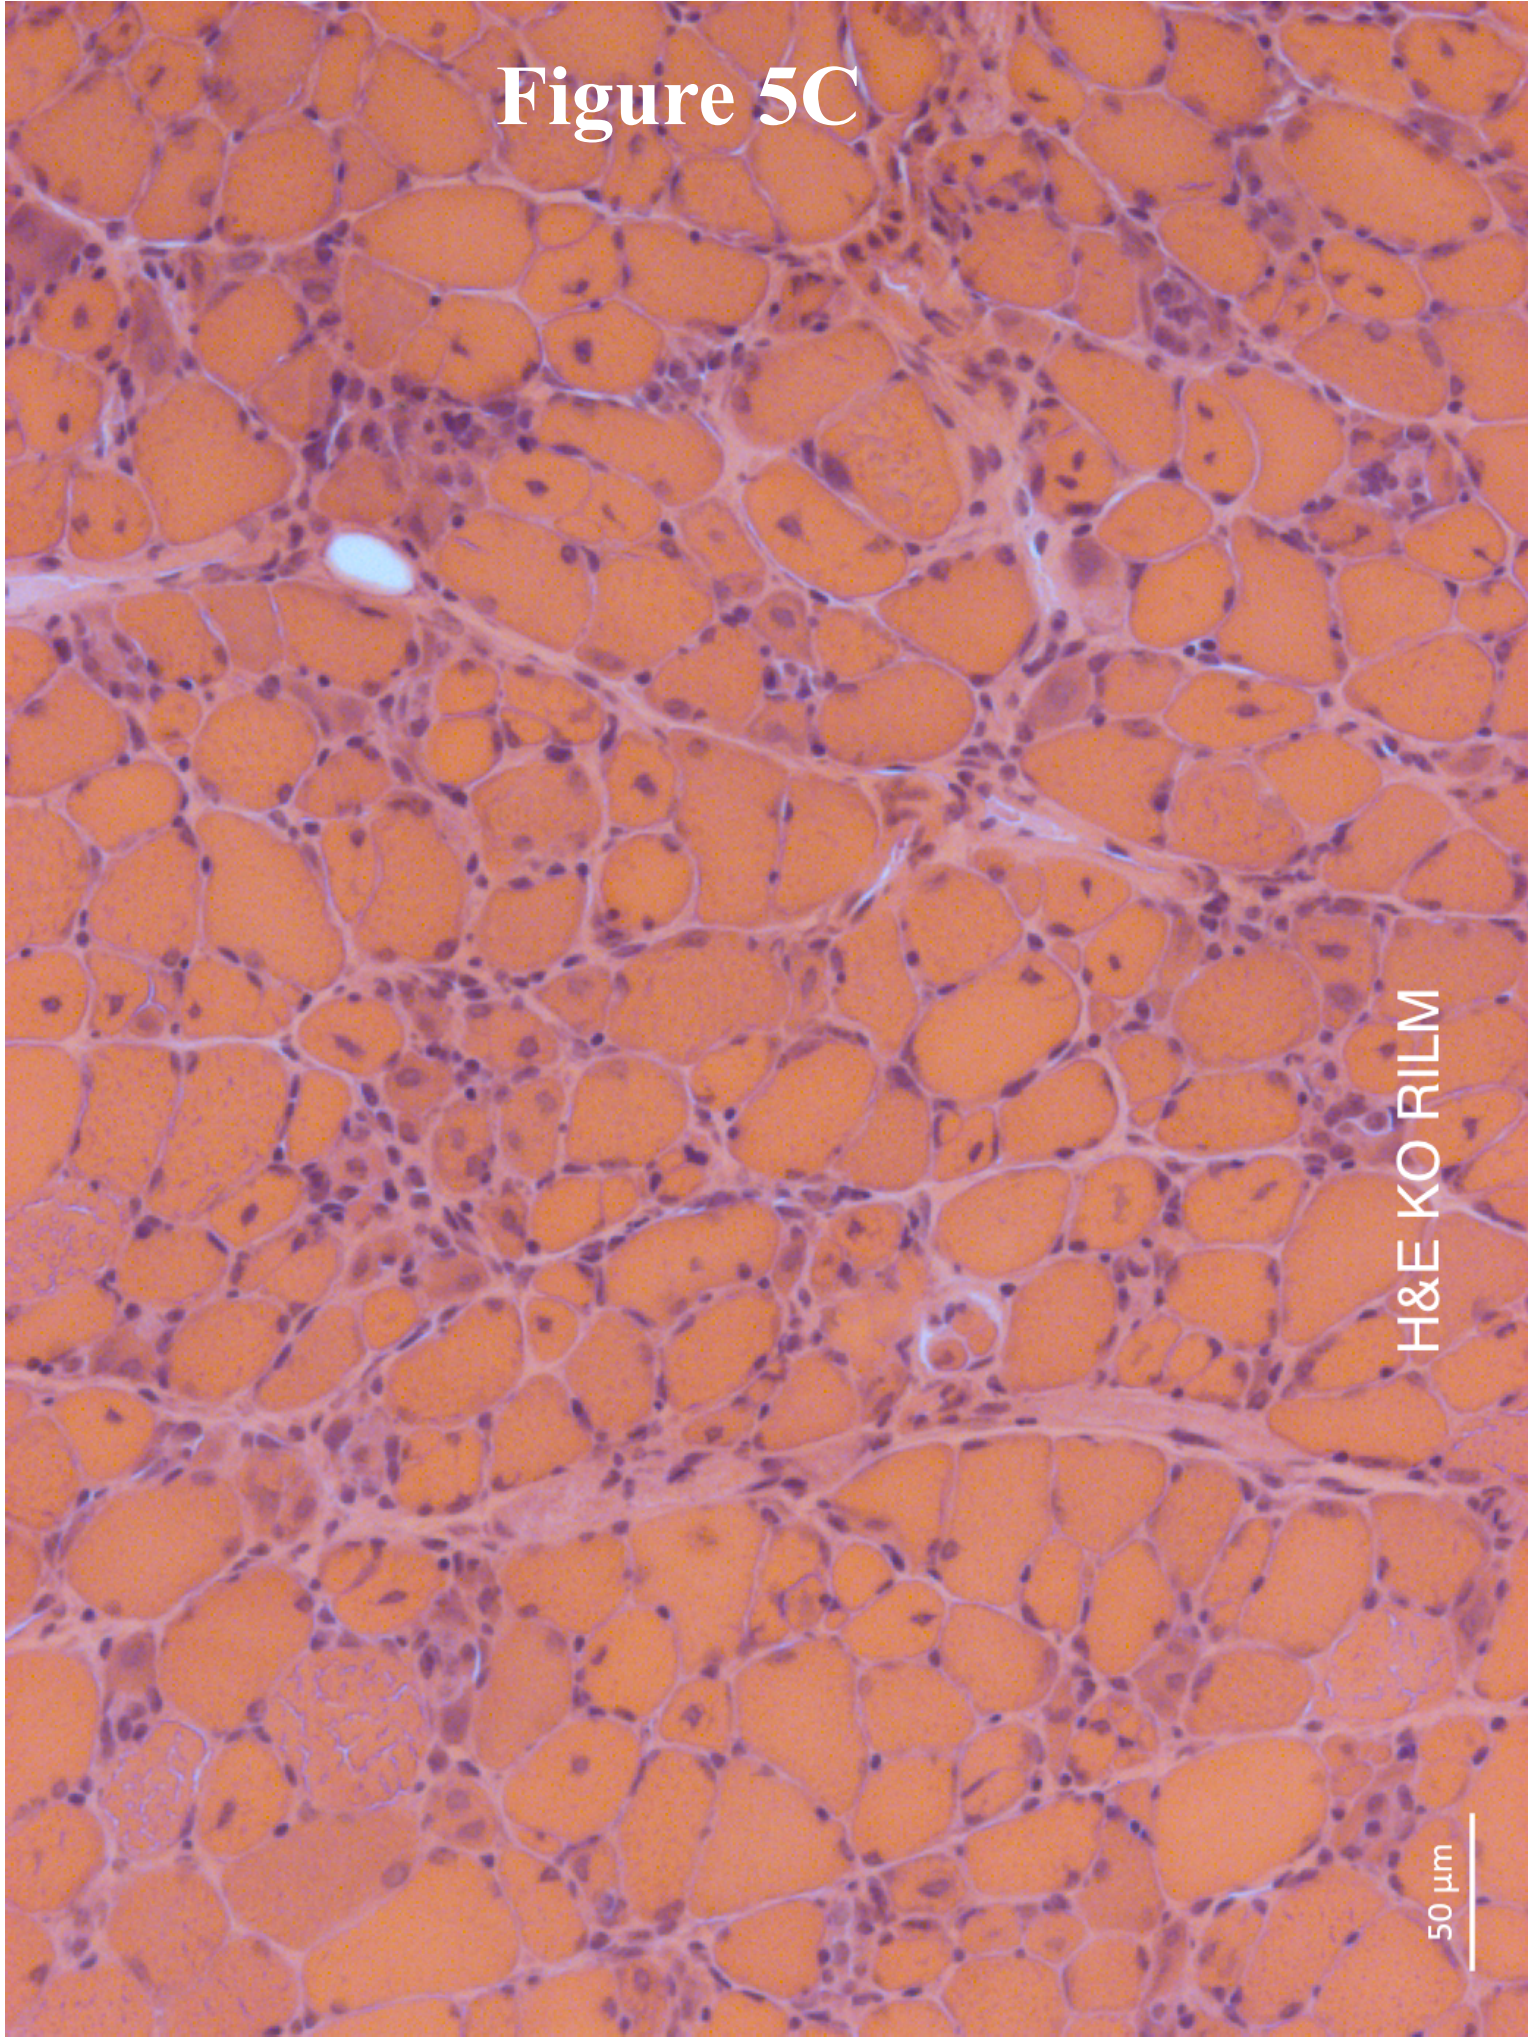

H&E KO RILM

50  $\mu$ m



**Figure 5C**

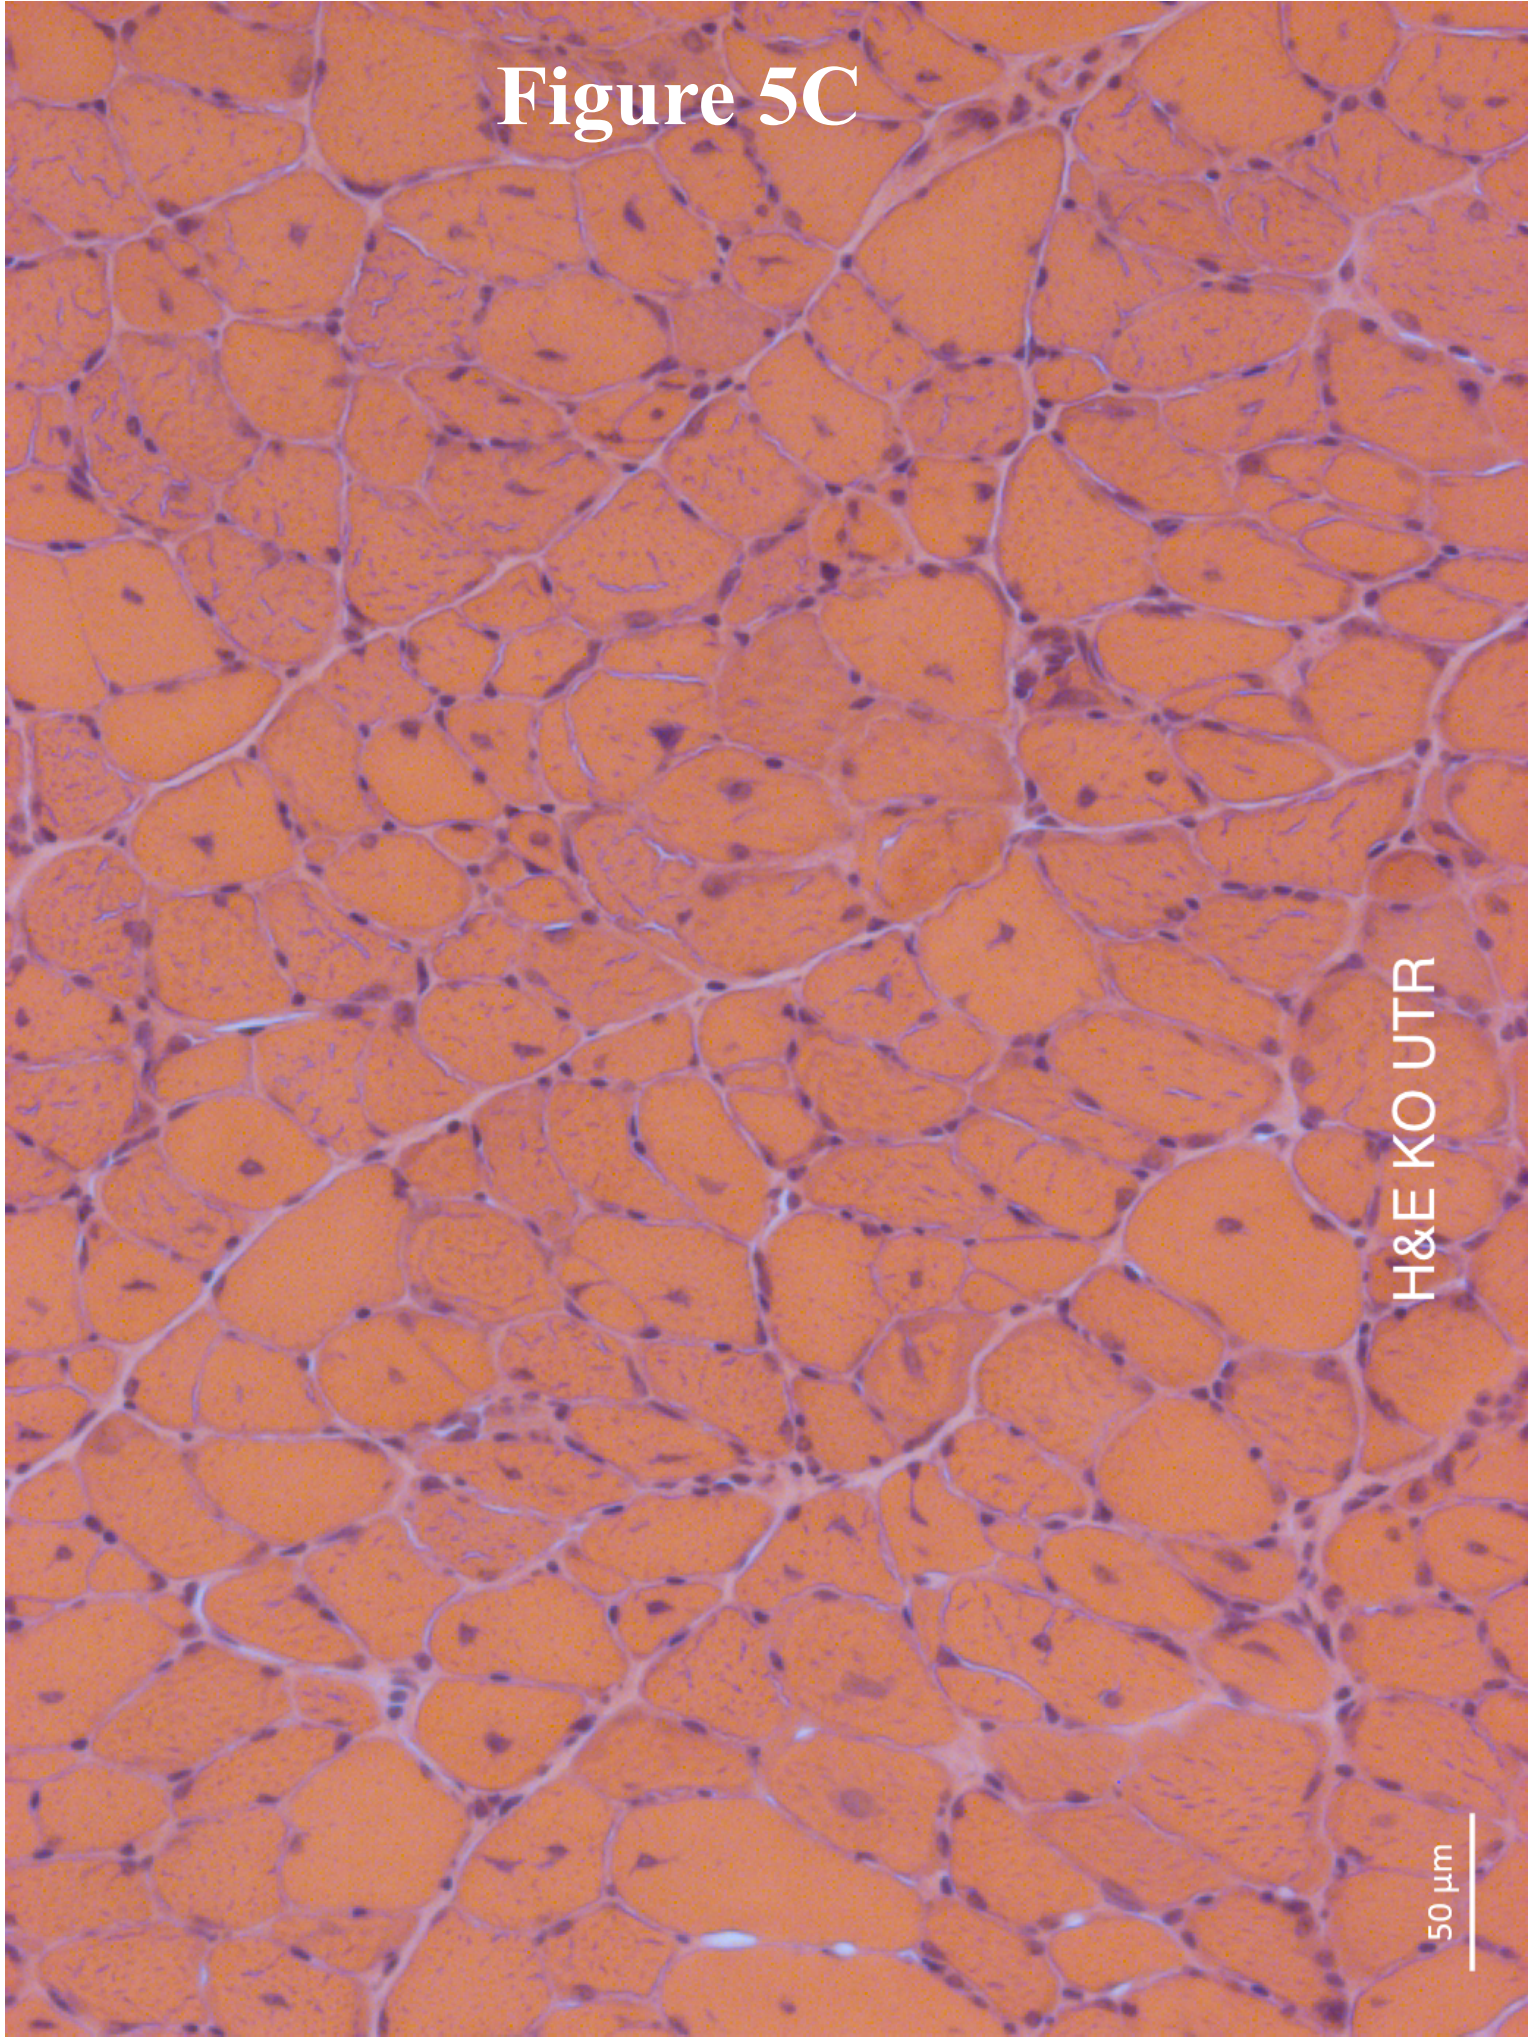

H&E KO UTR

50  $\mu$ m



**Figure 5C**

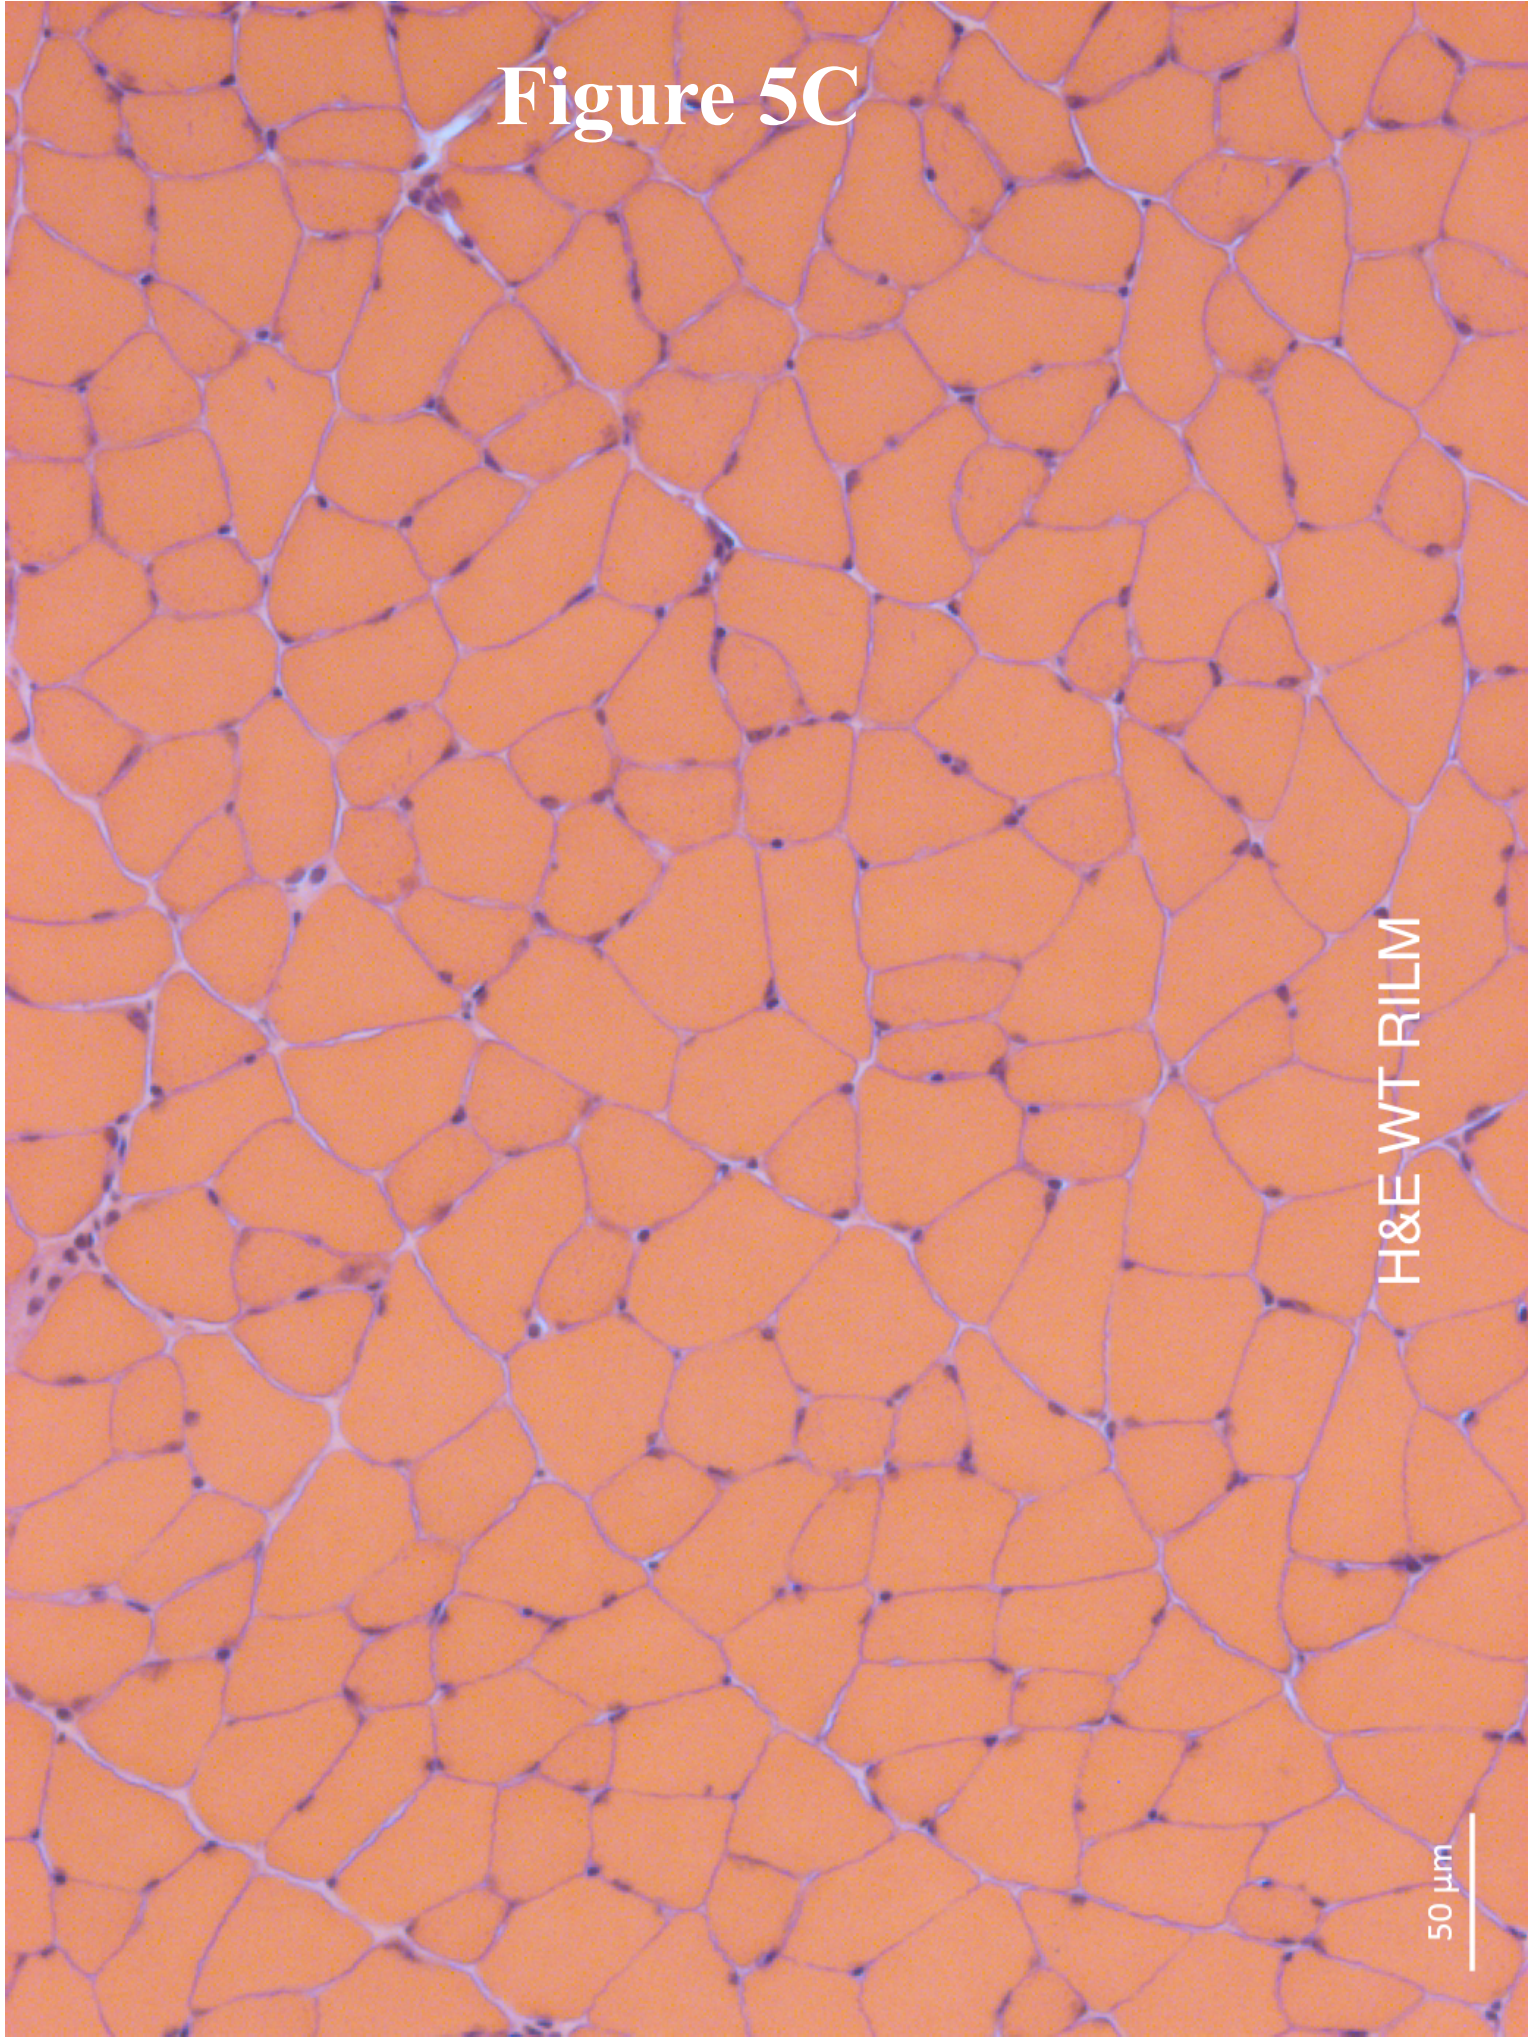

H&E WT RILM

50  $\mu$ m



Figure 5C

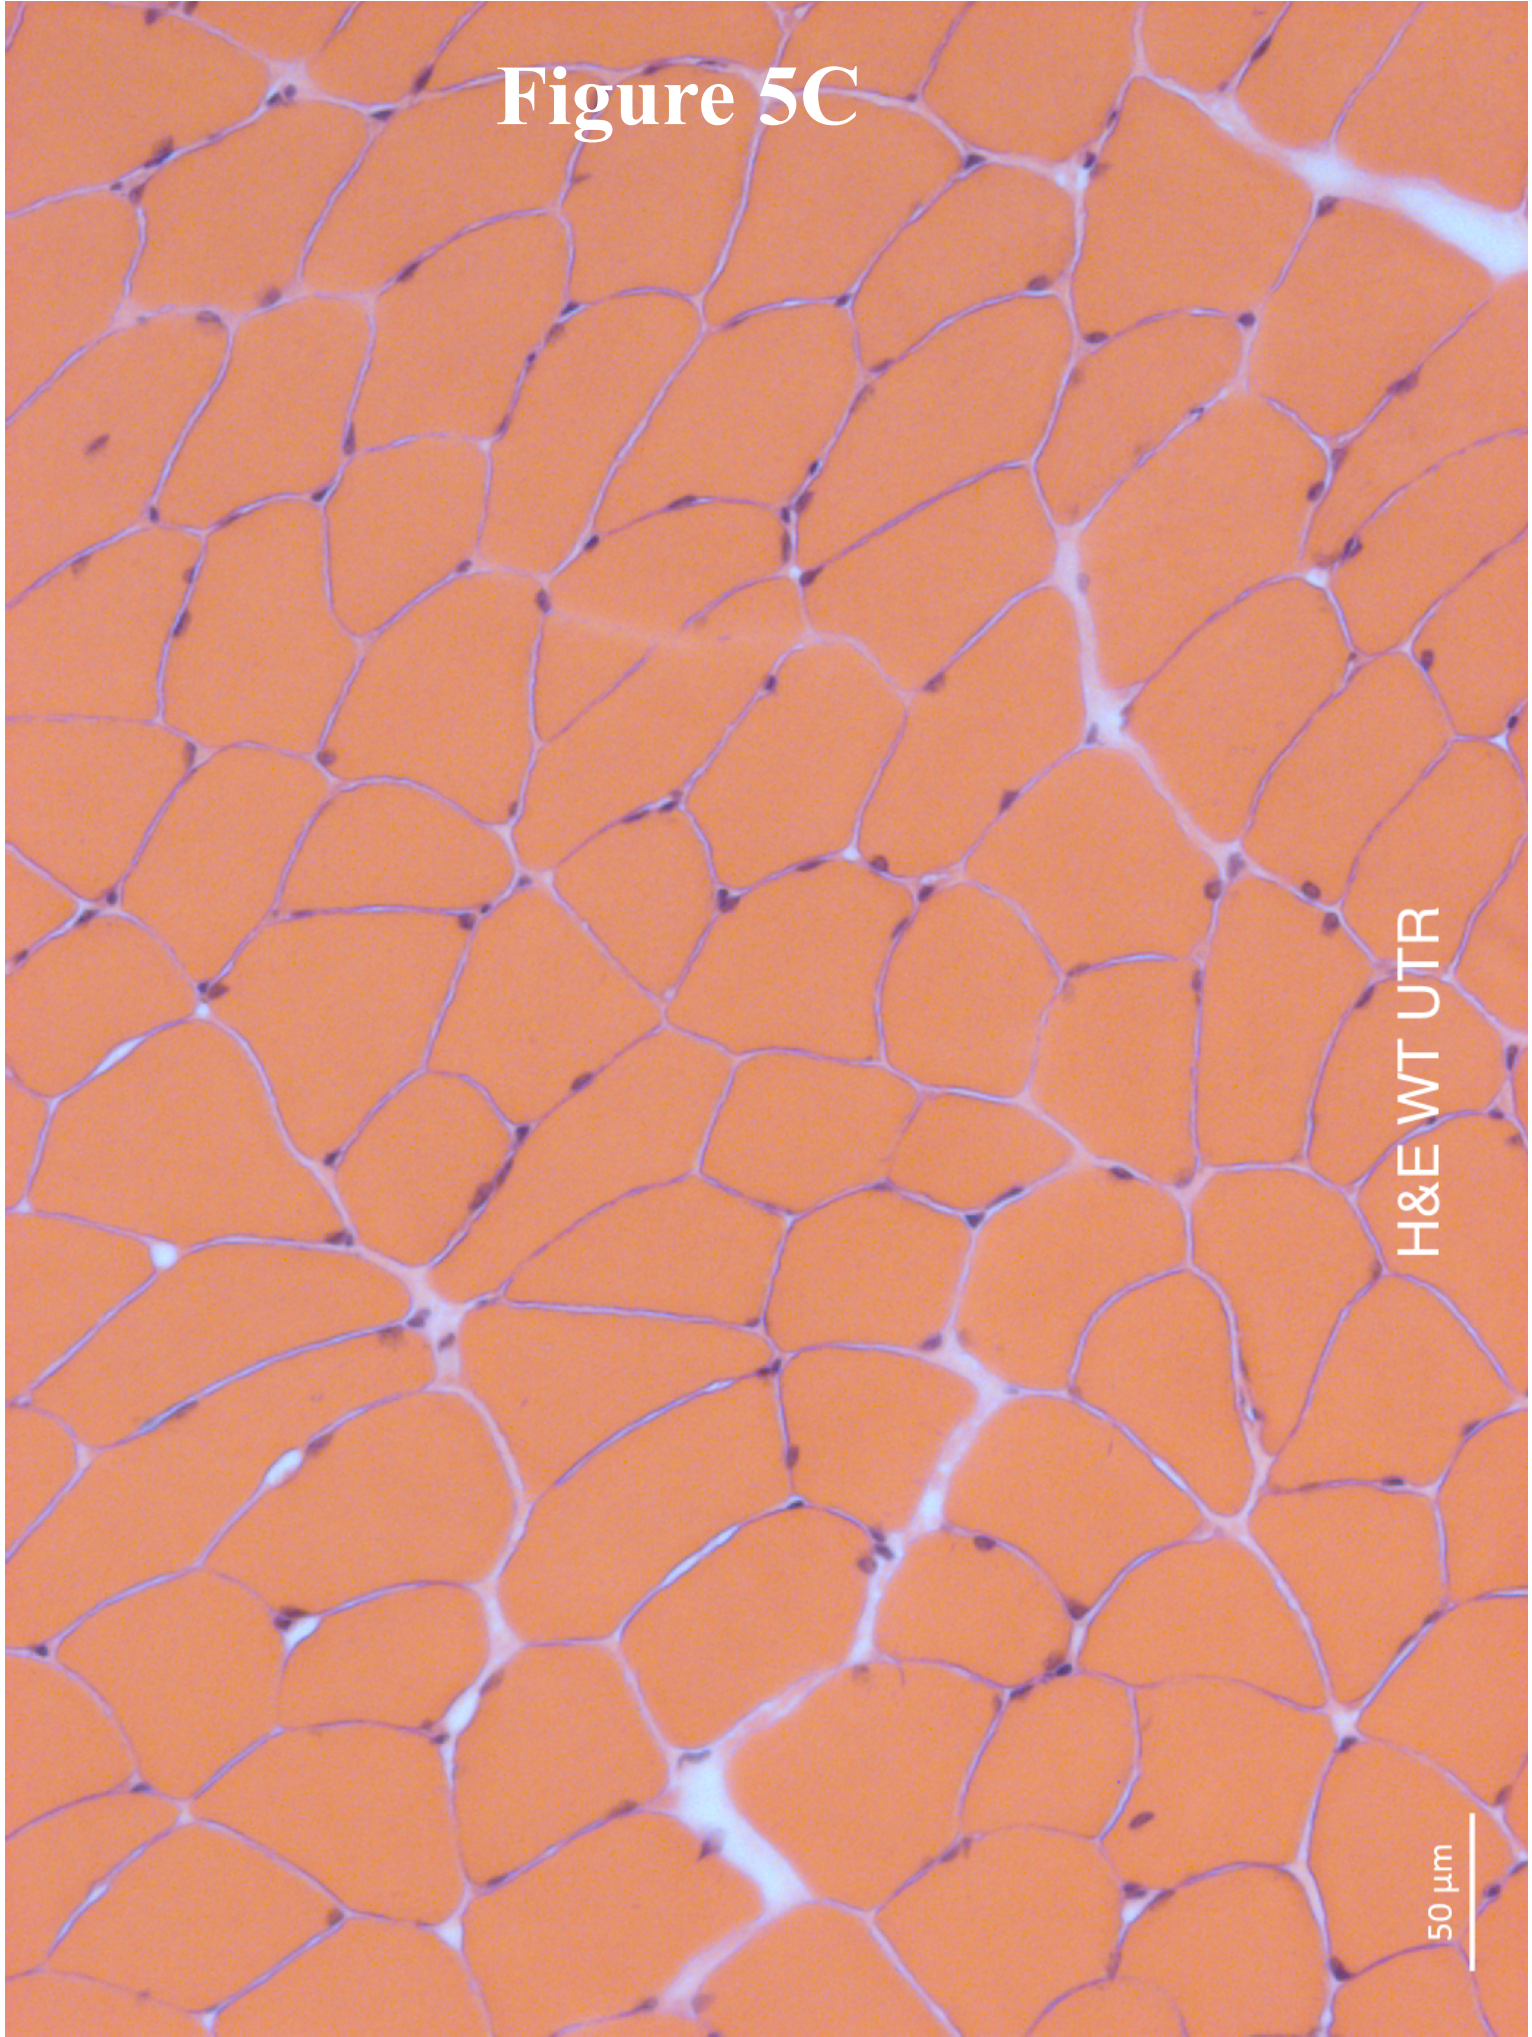

H&E WT UTR

50  $\mu$ m



**Figure 5C**

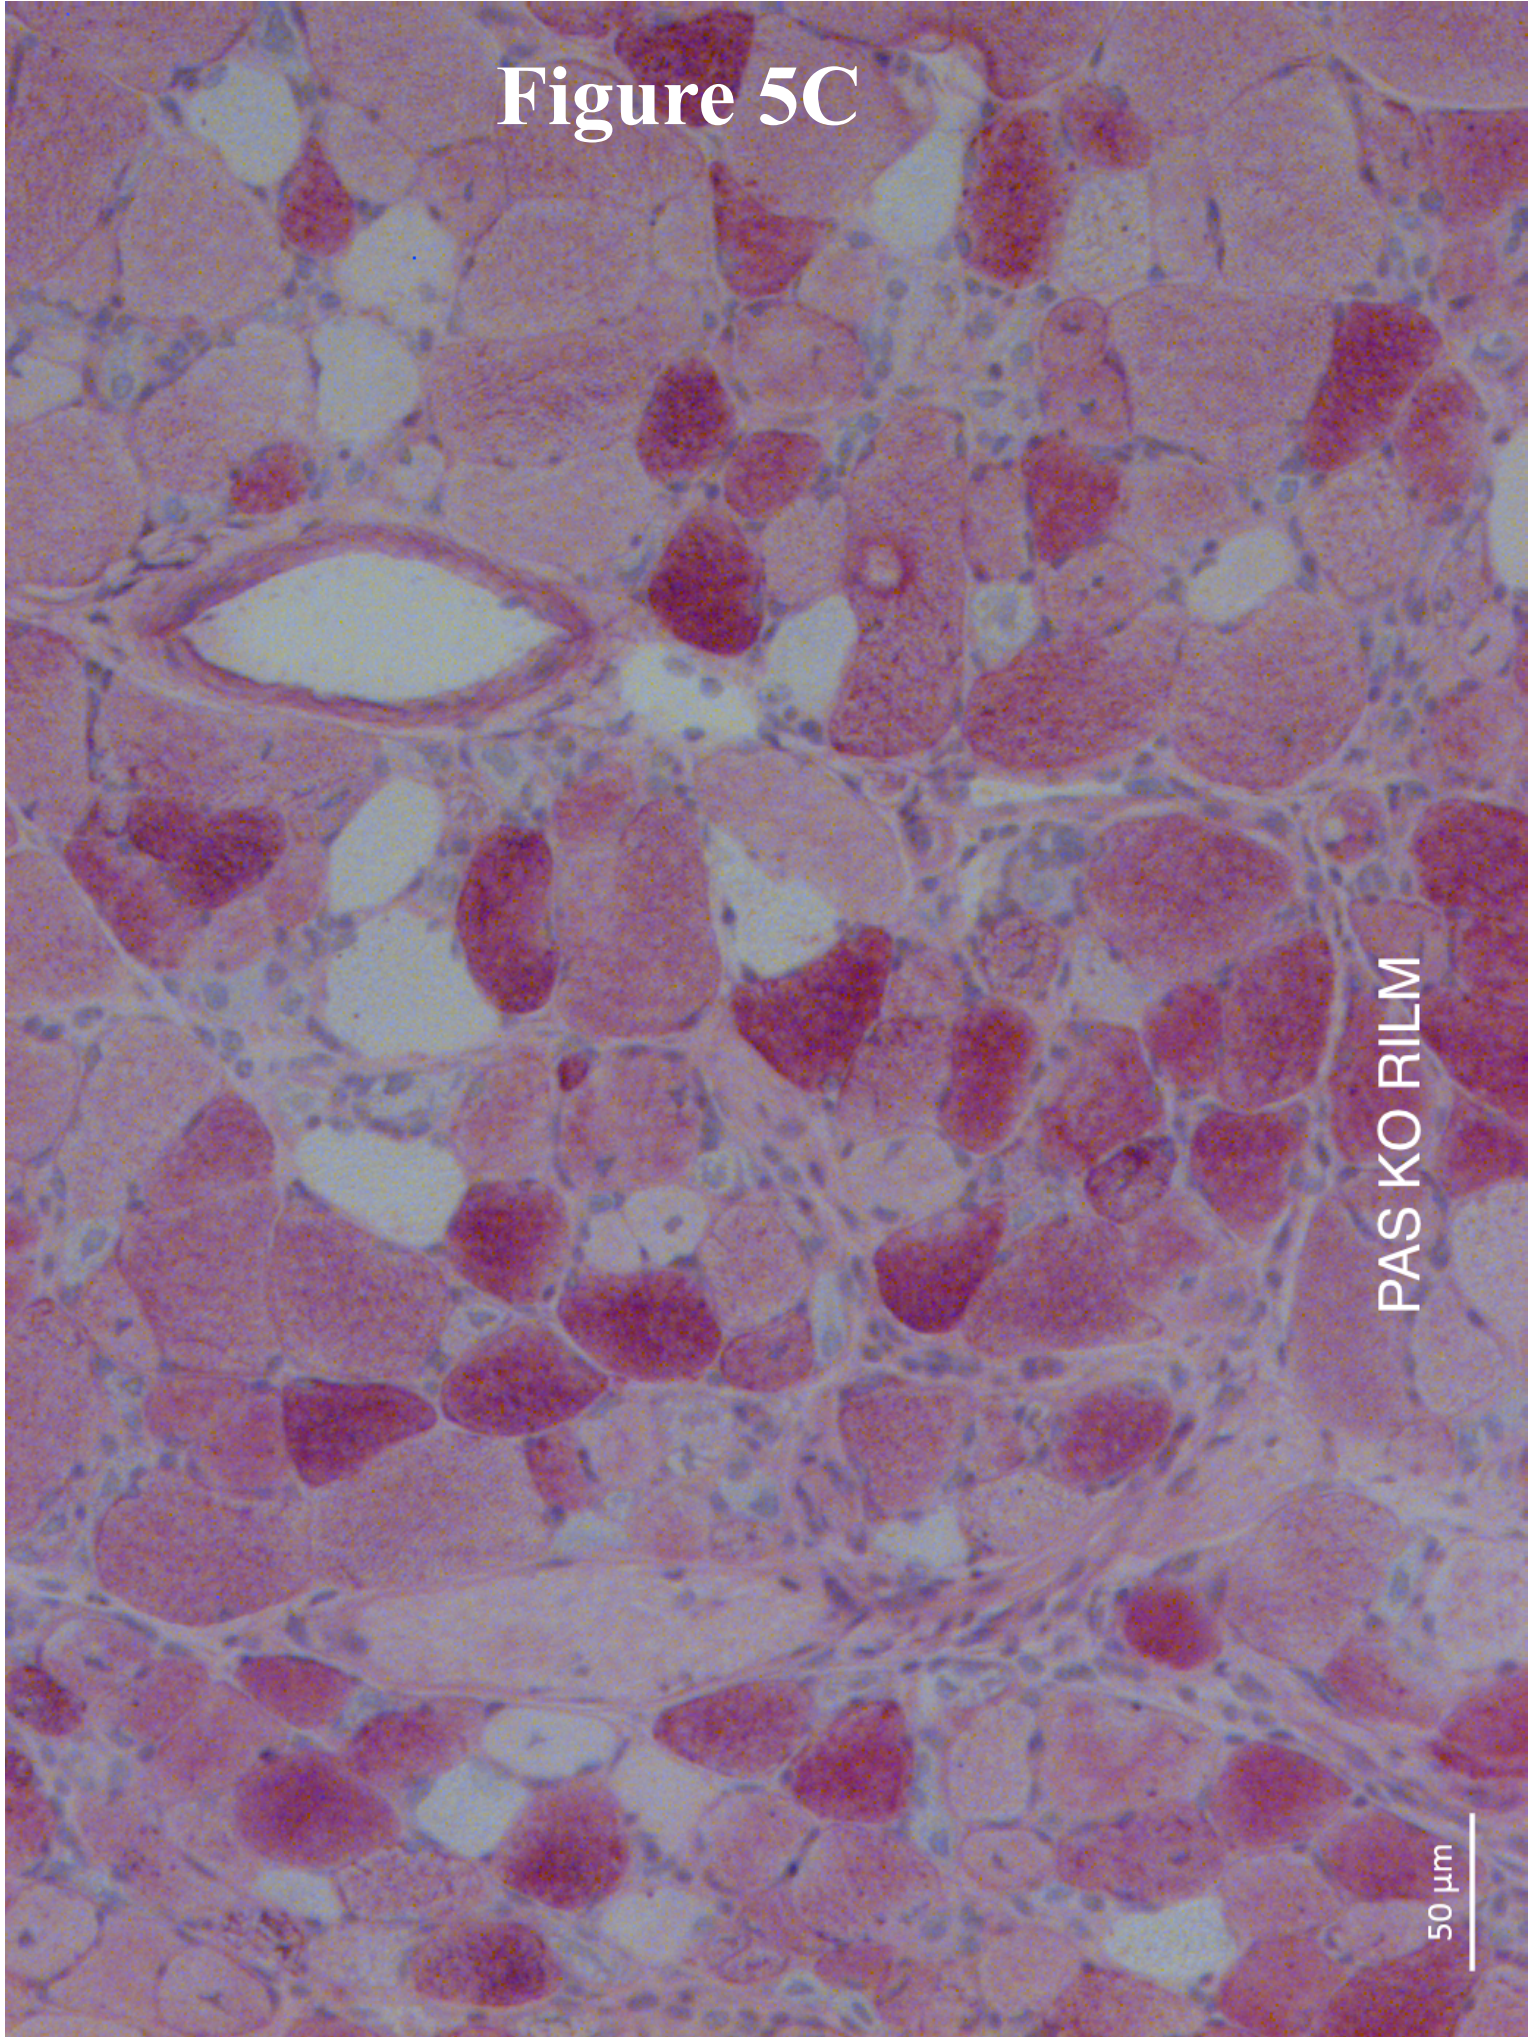

PAS KO RILM

50  $\mu$ m



Figure 5C

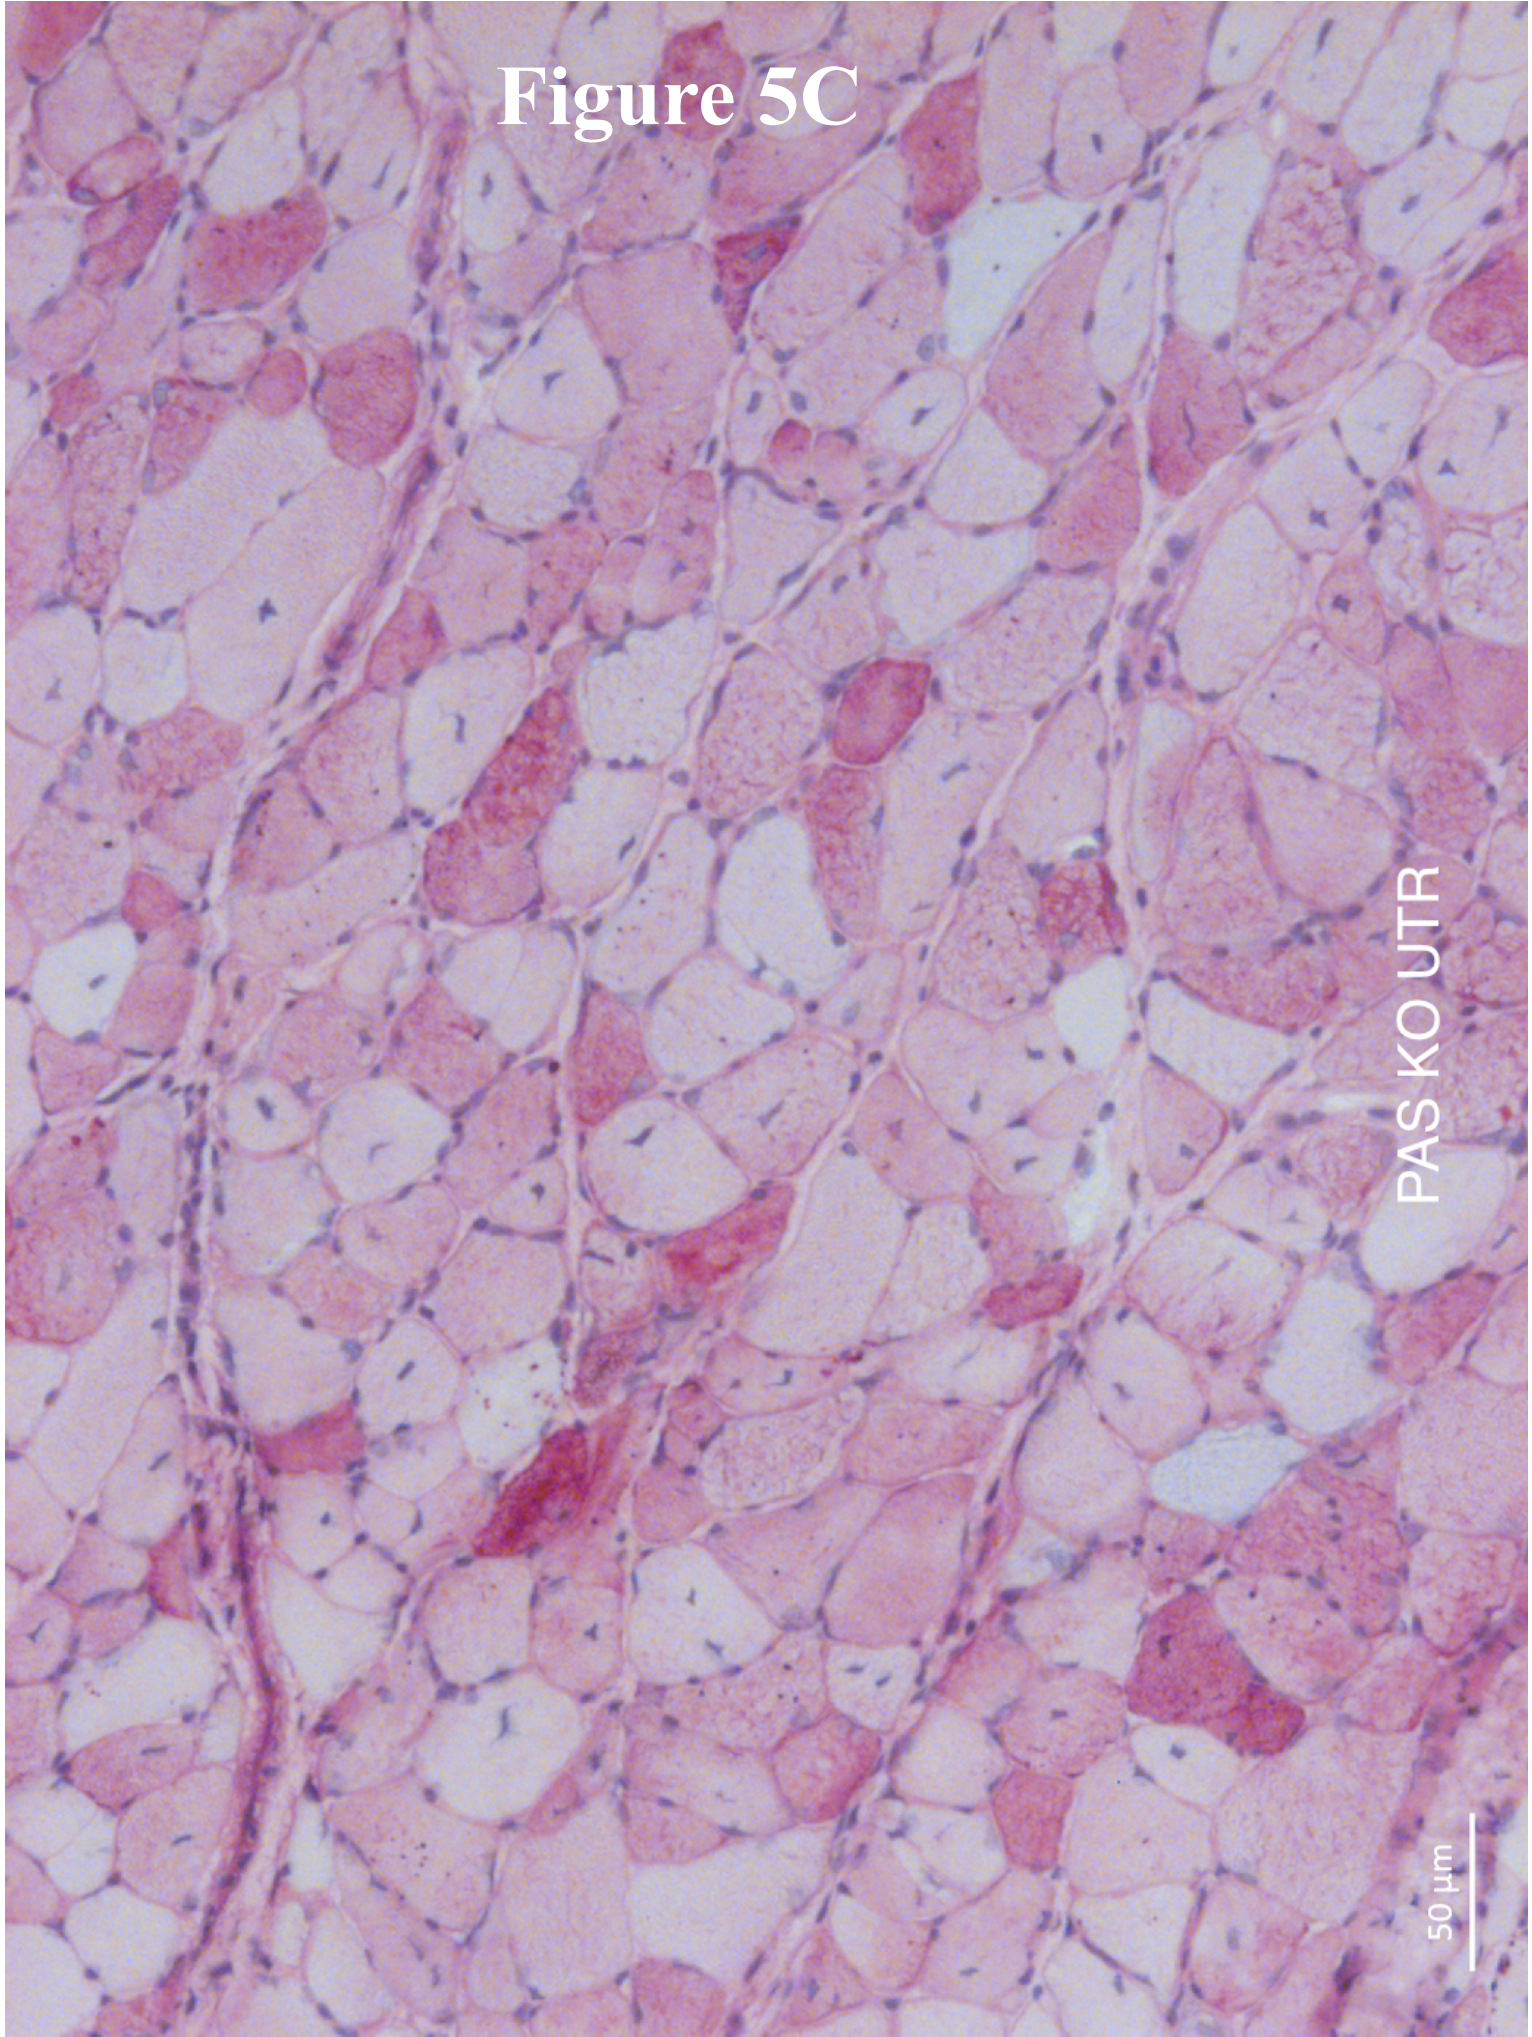



Figure 5C

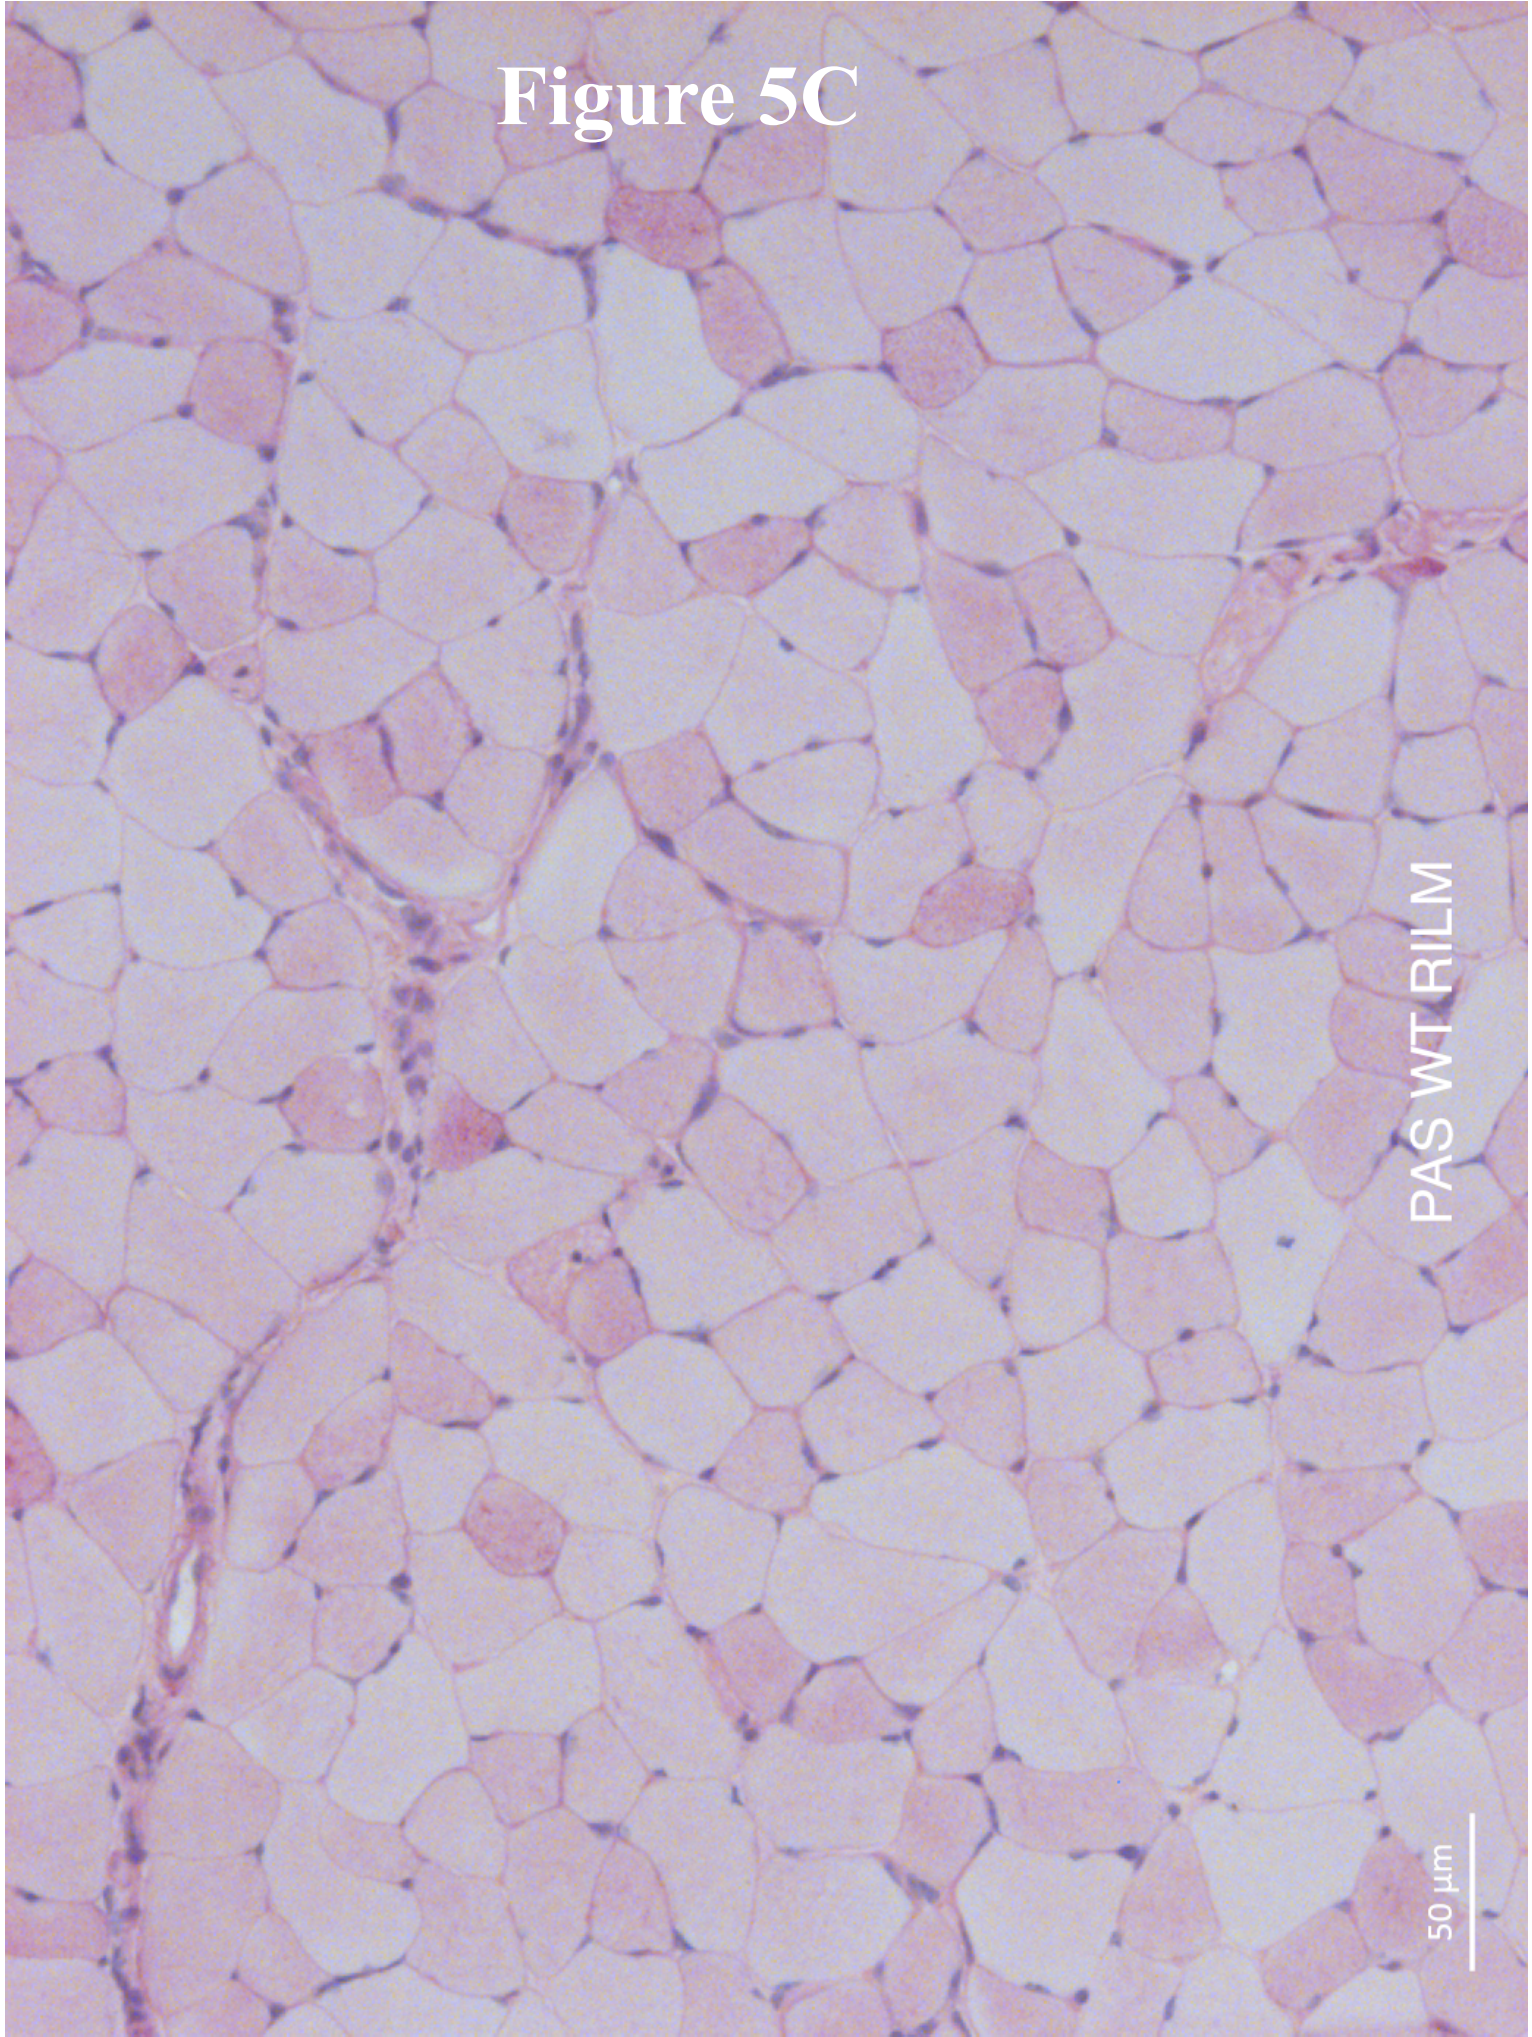

PAS WT RILM

50  $\mu$ m



Figure 5C

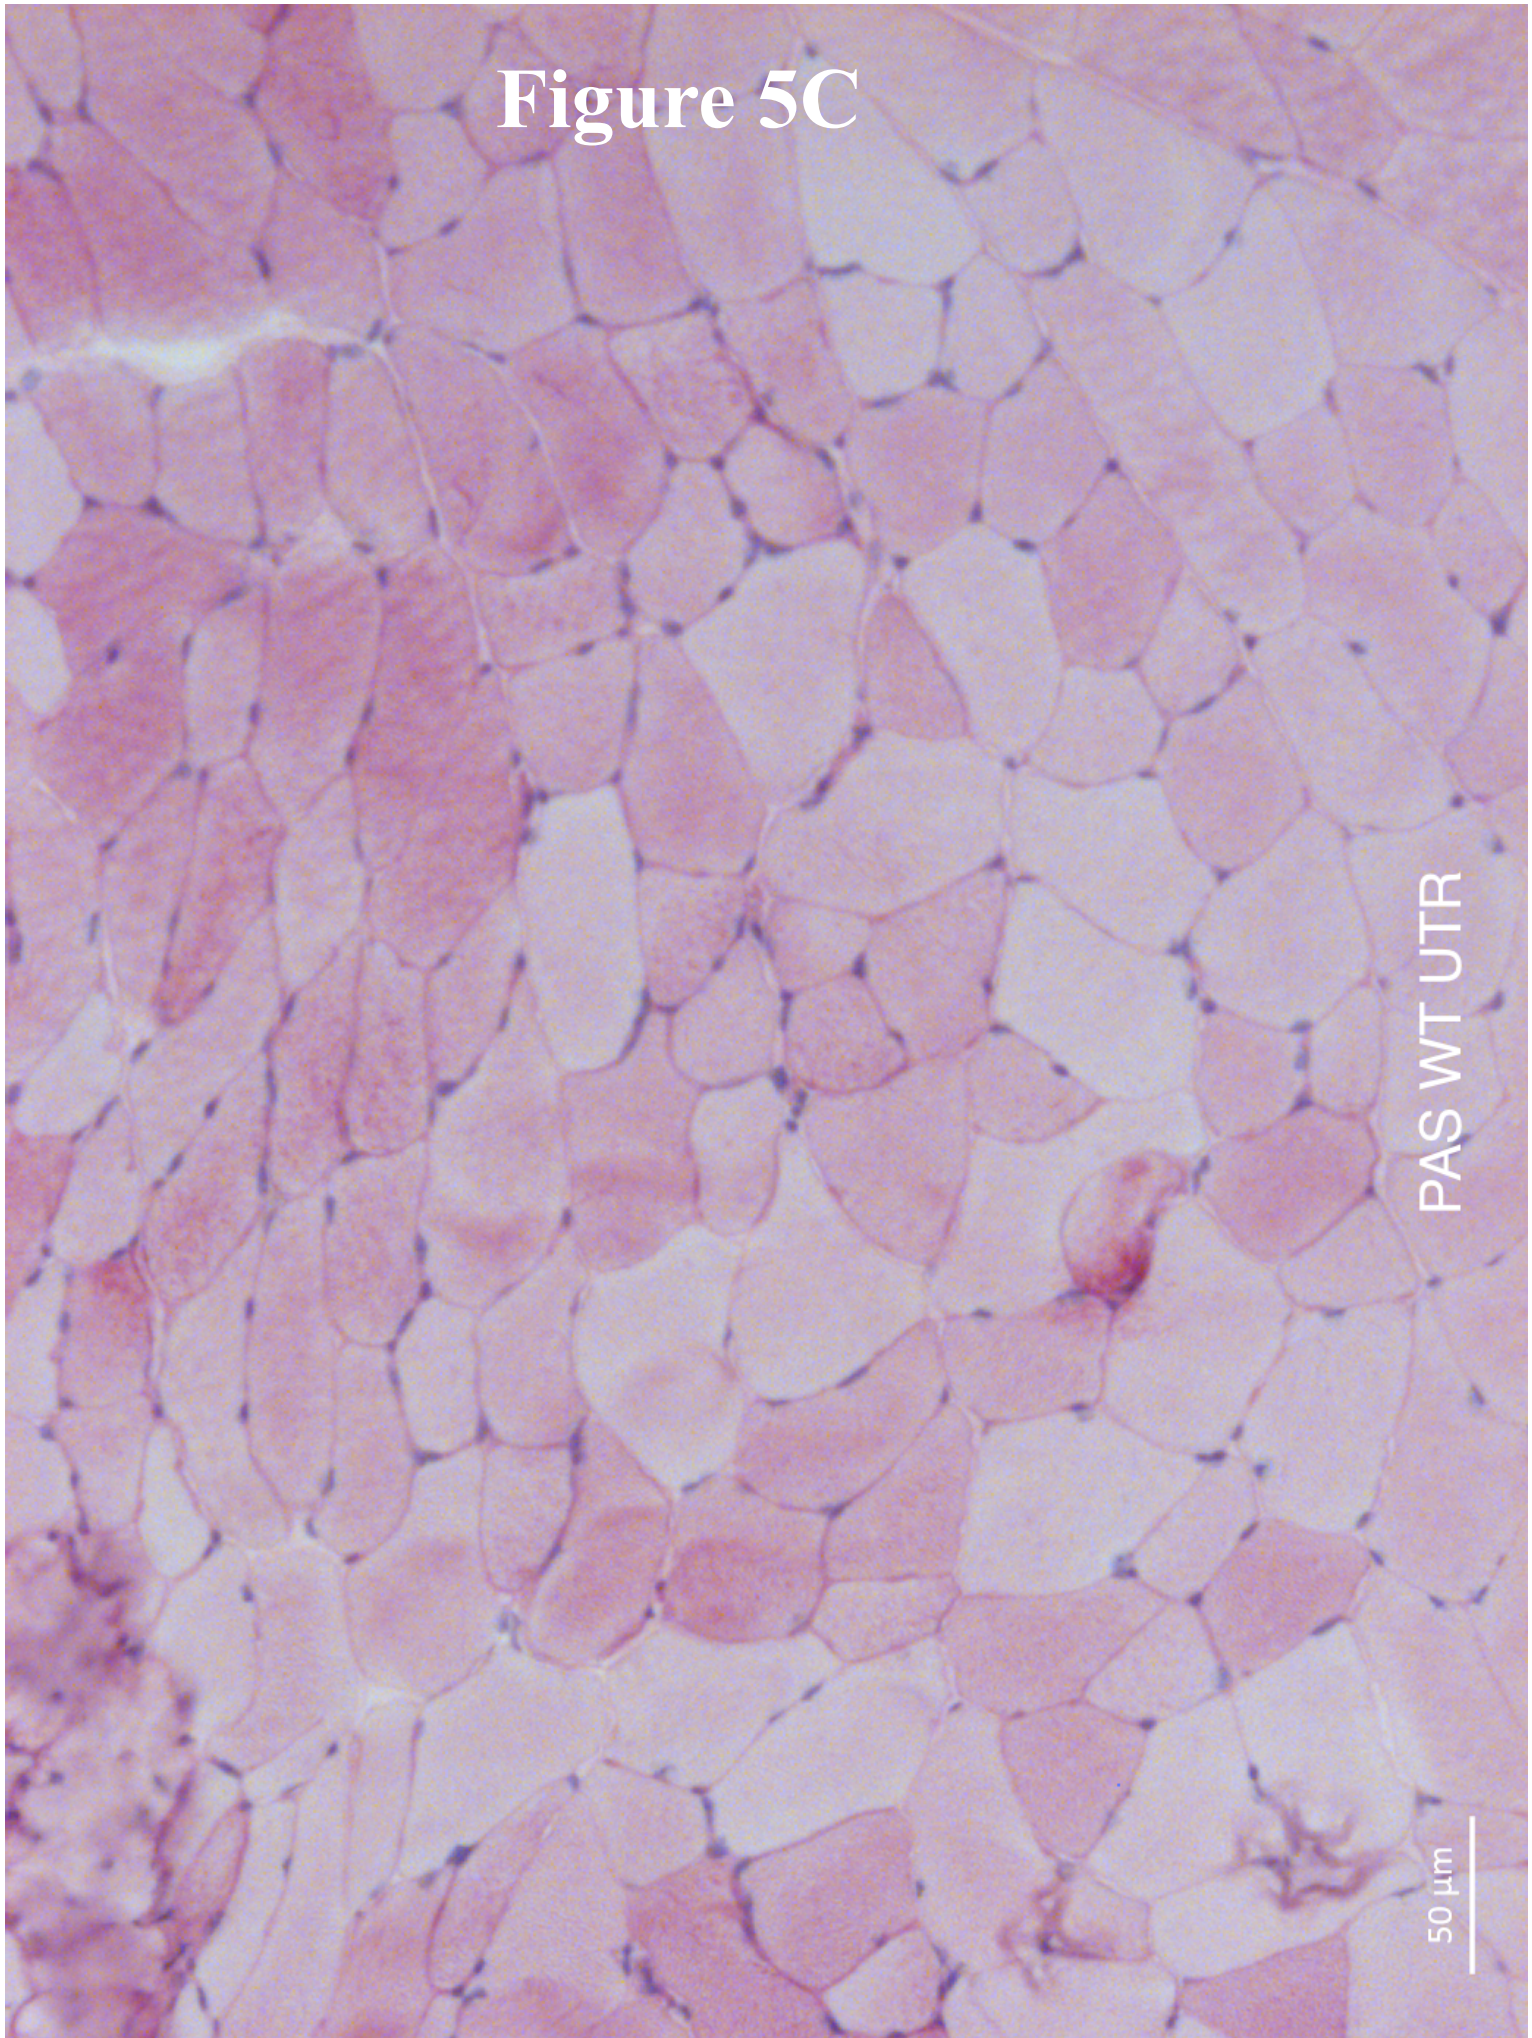

PAS WT UTR

50  $\mu$ m



**Figure 5C**

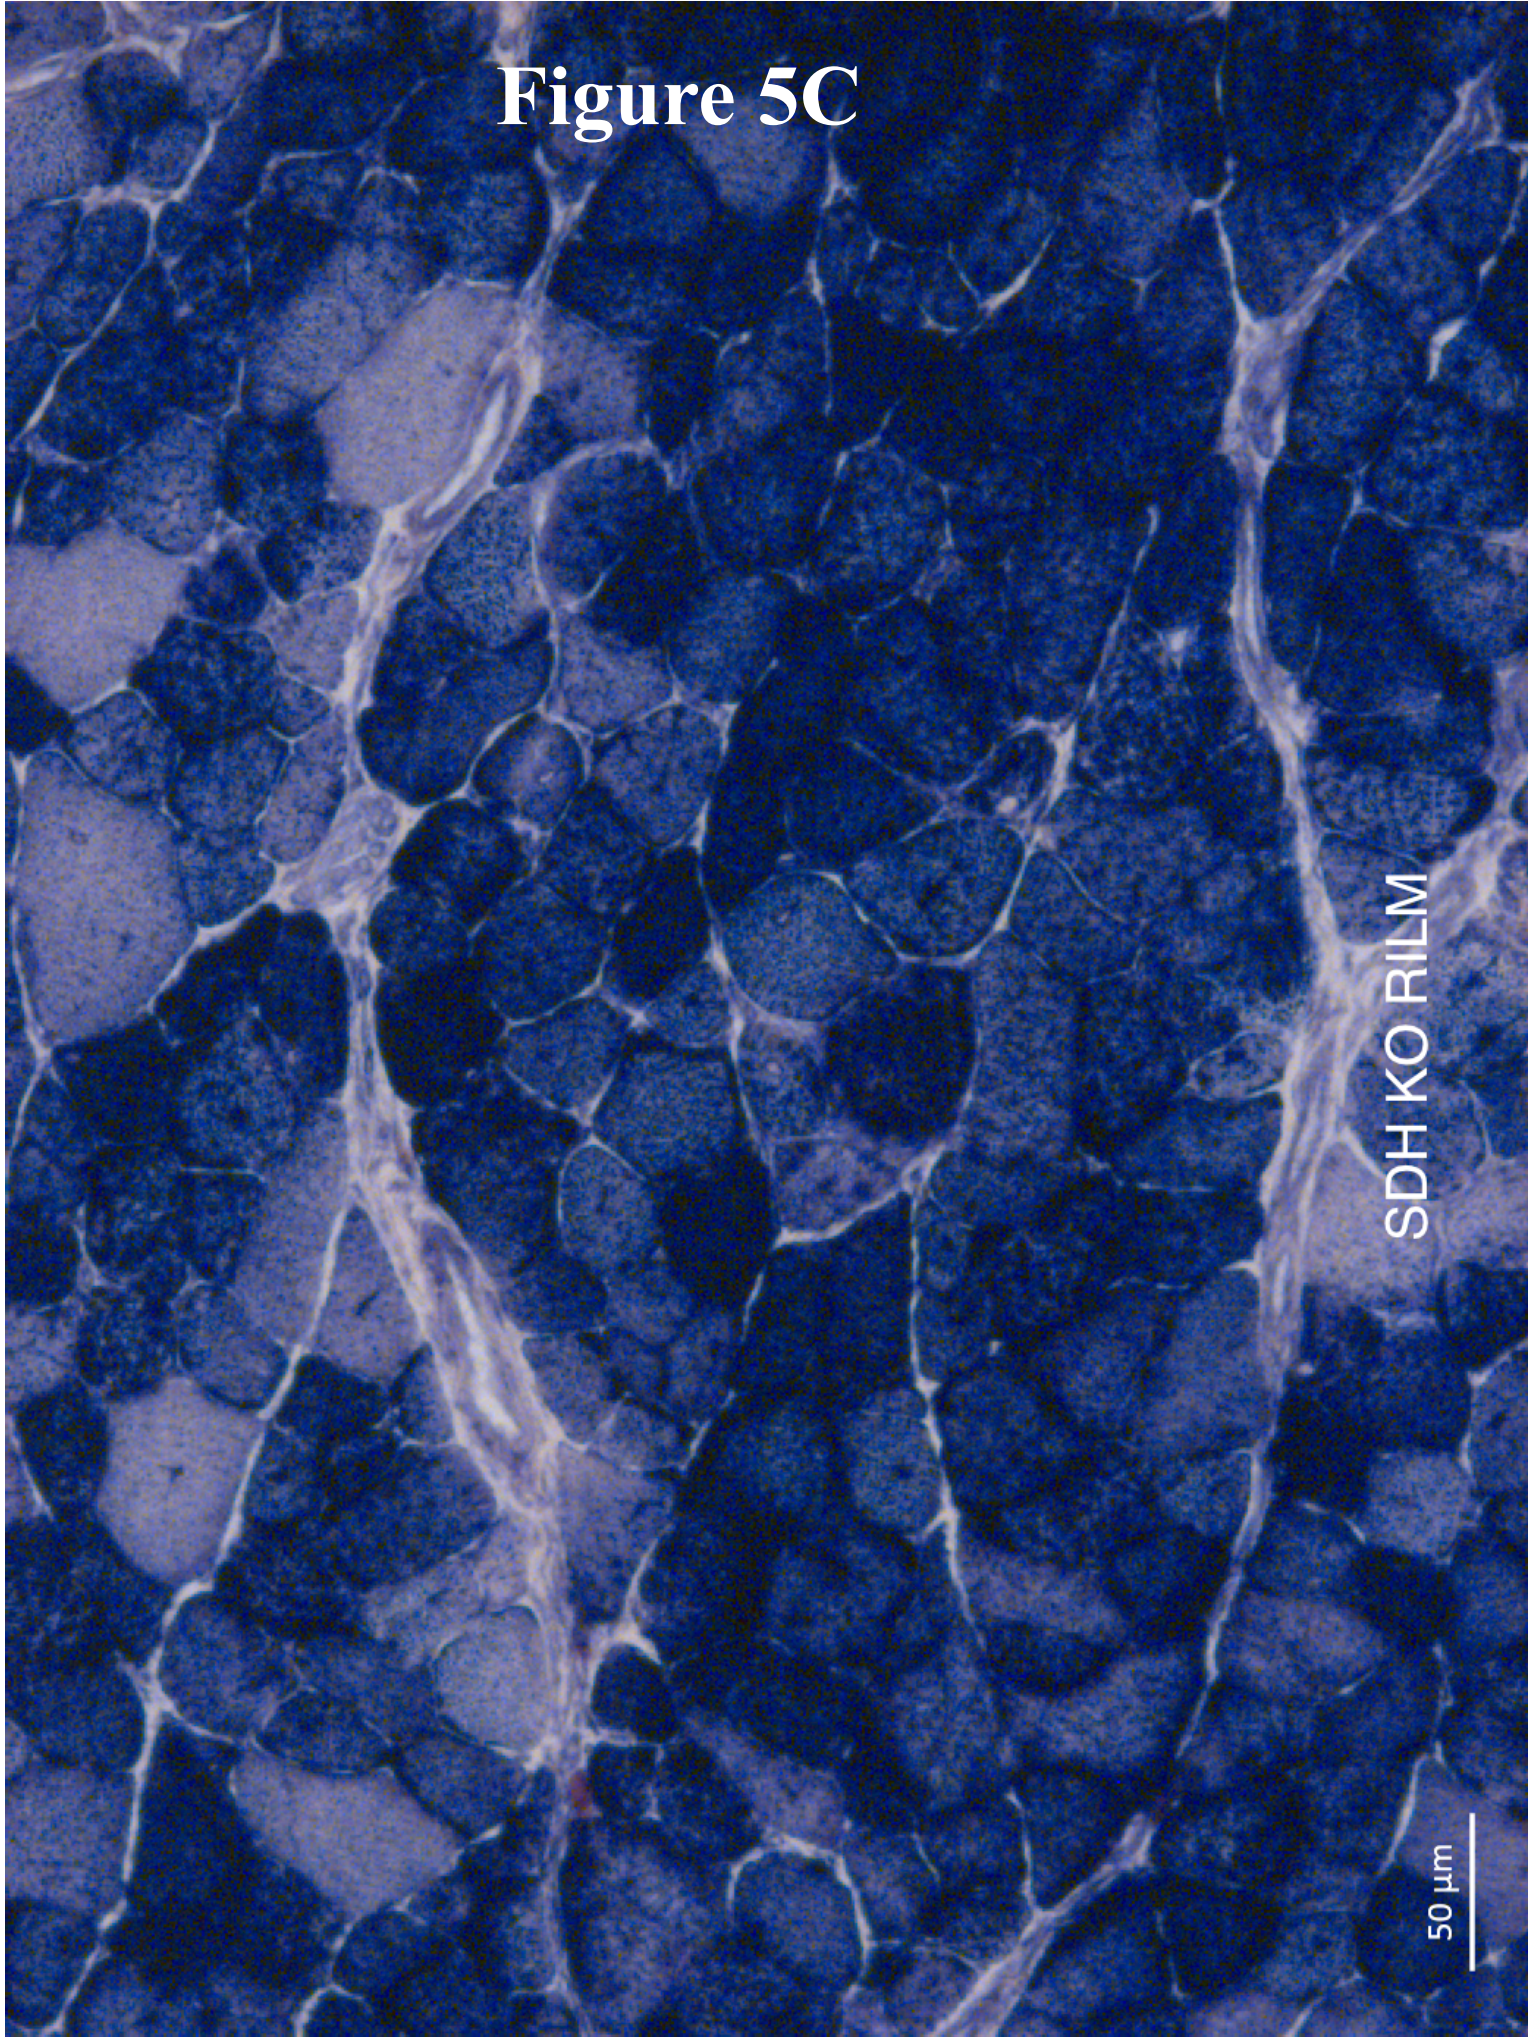

SDH KO RILM

50  $\mu$ m



**Figure 5C**

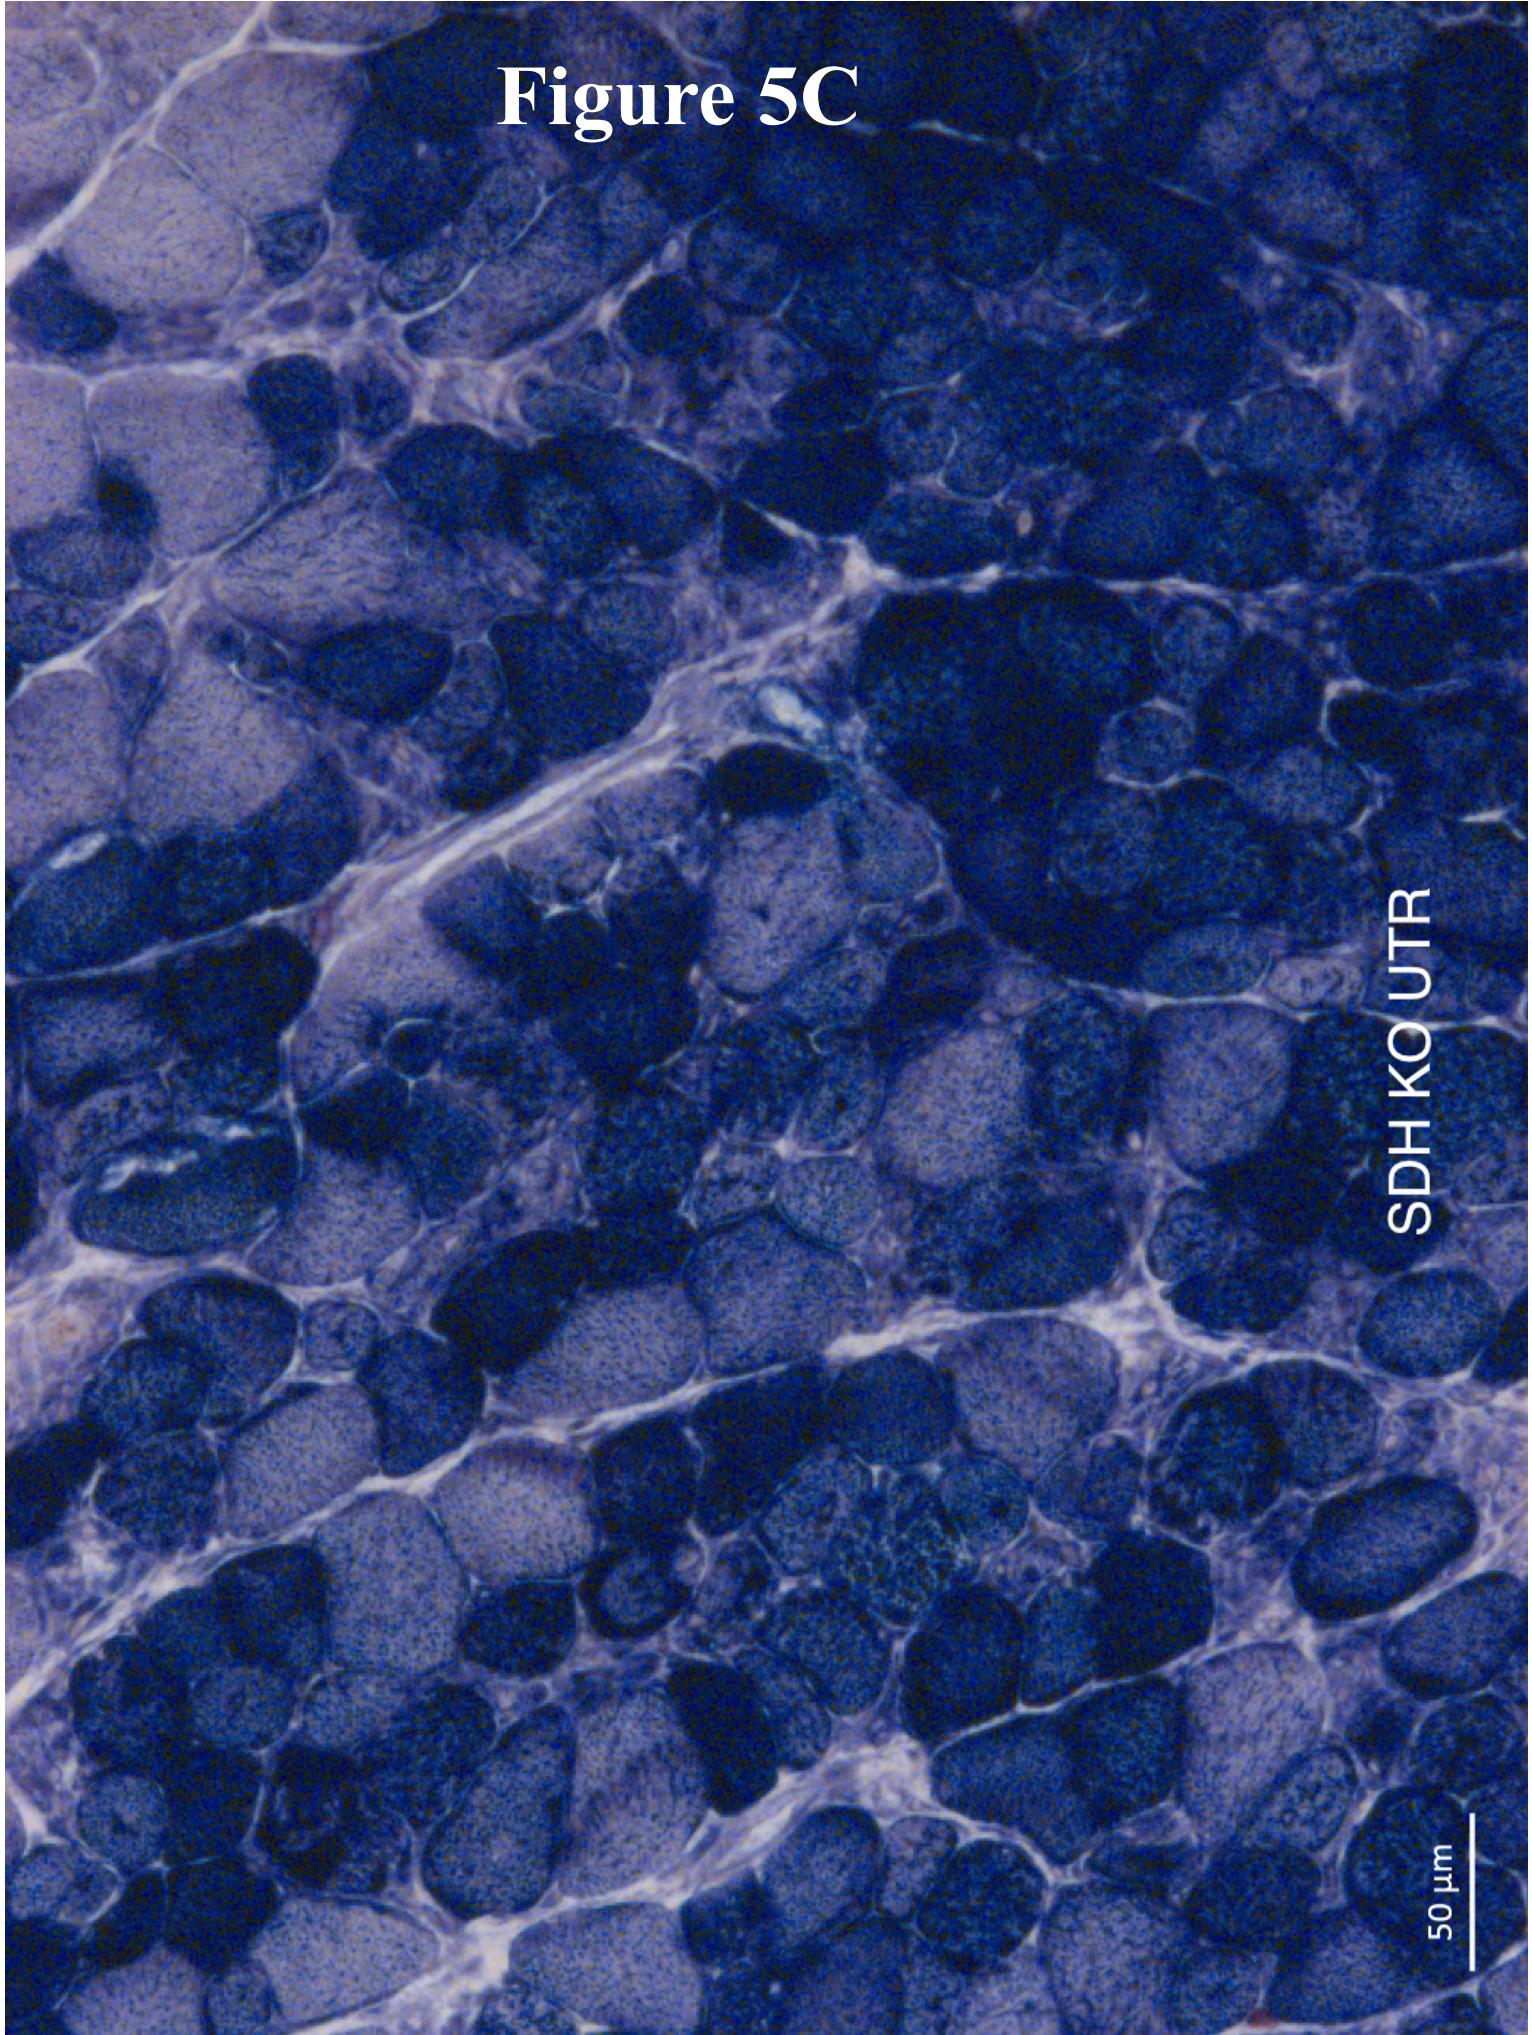

SDH KO UTR

50  $\mu$ m



**Figure 5C**

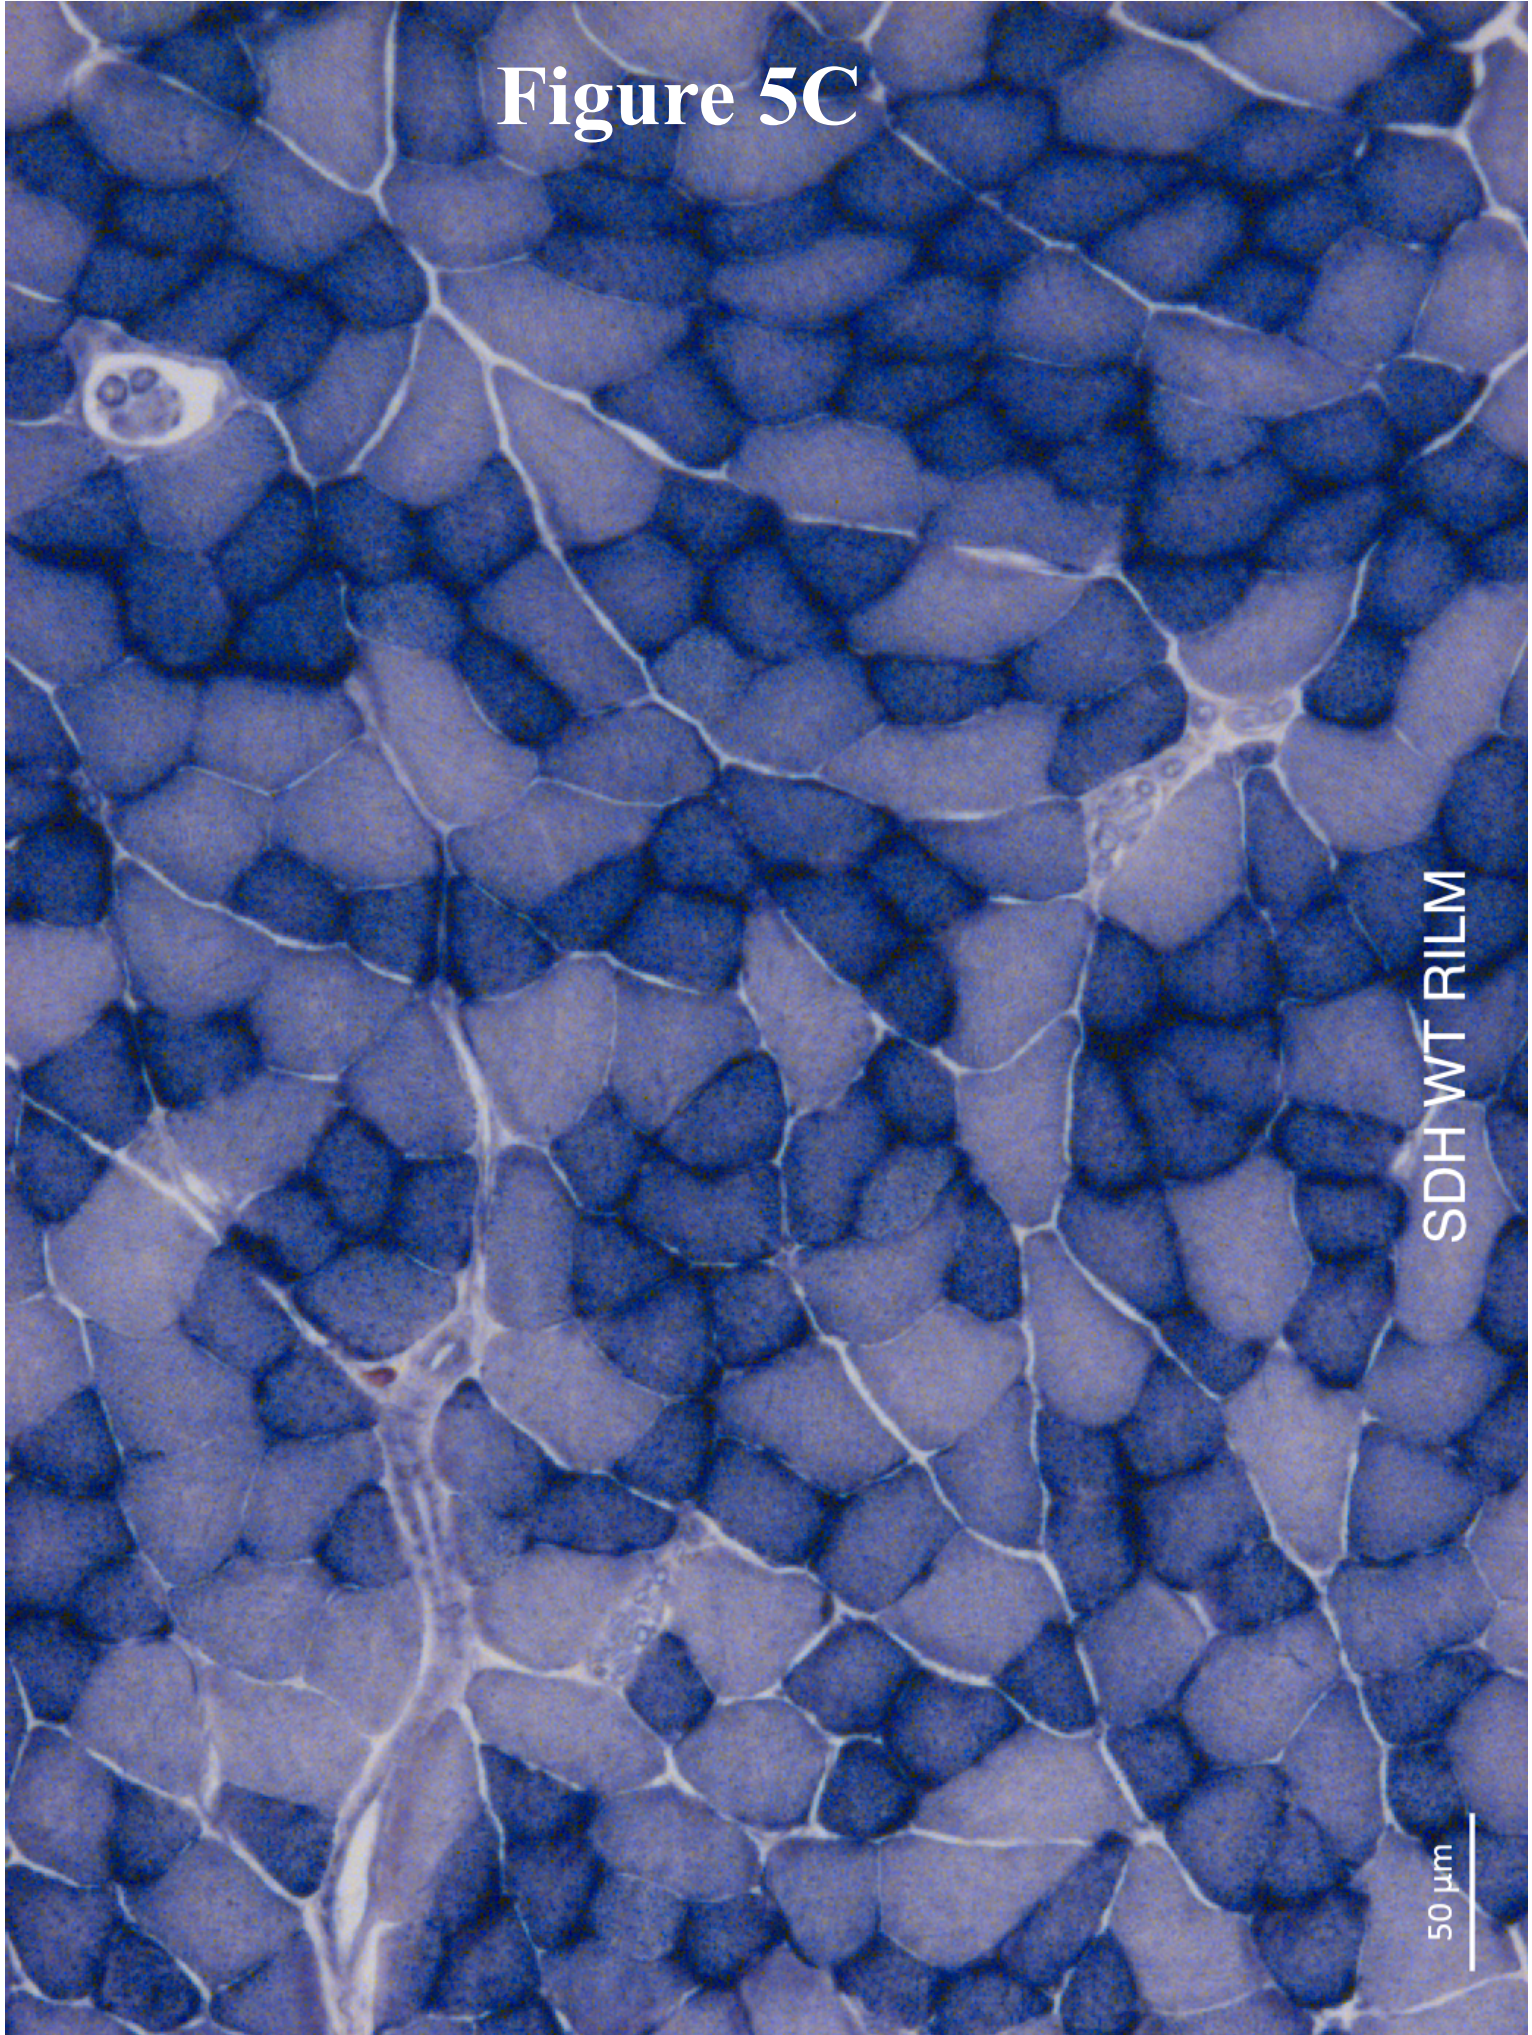

SDH WT RILM

50 μm



**Figure 5C**

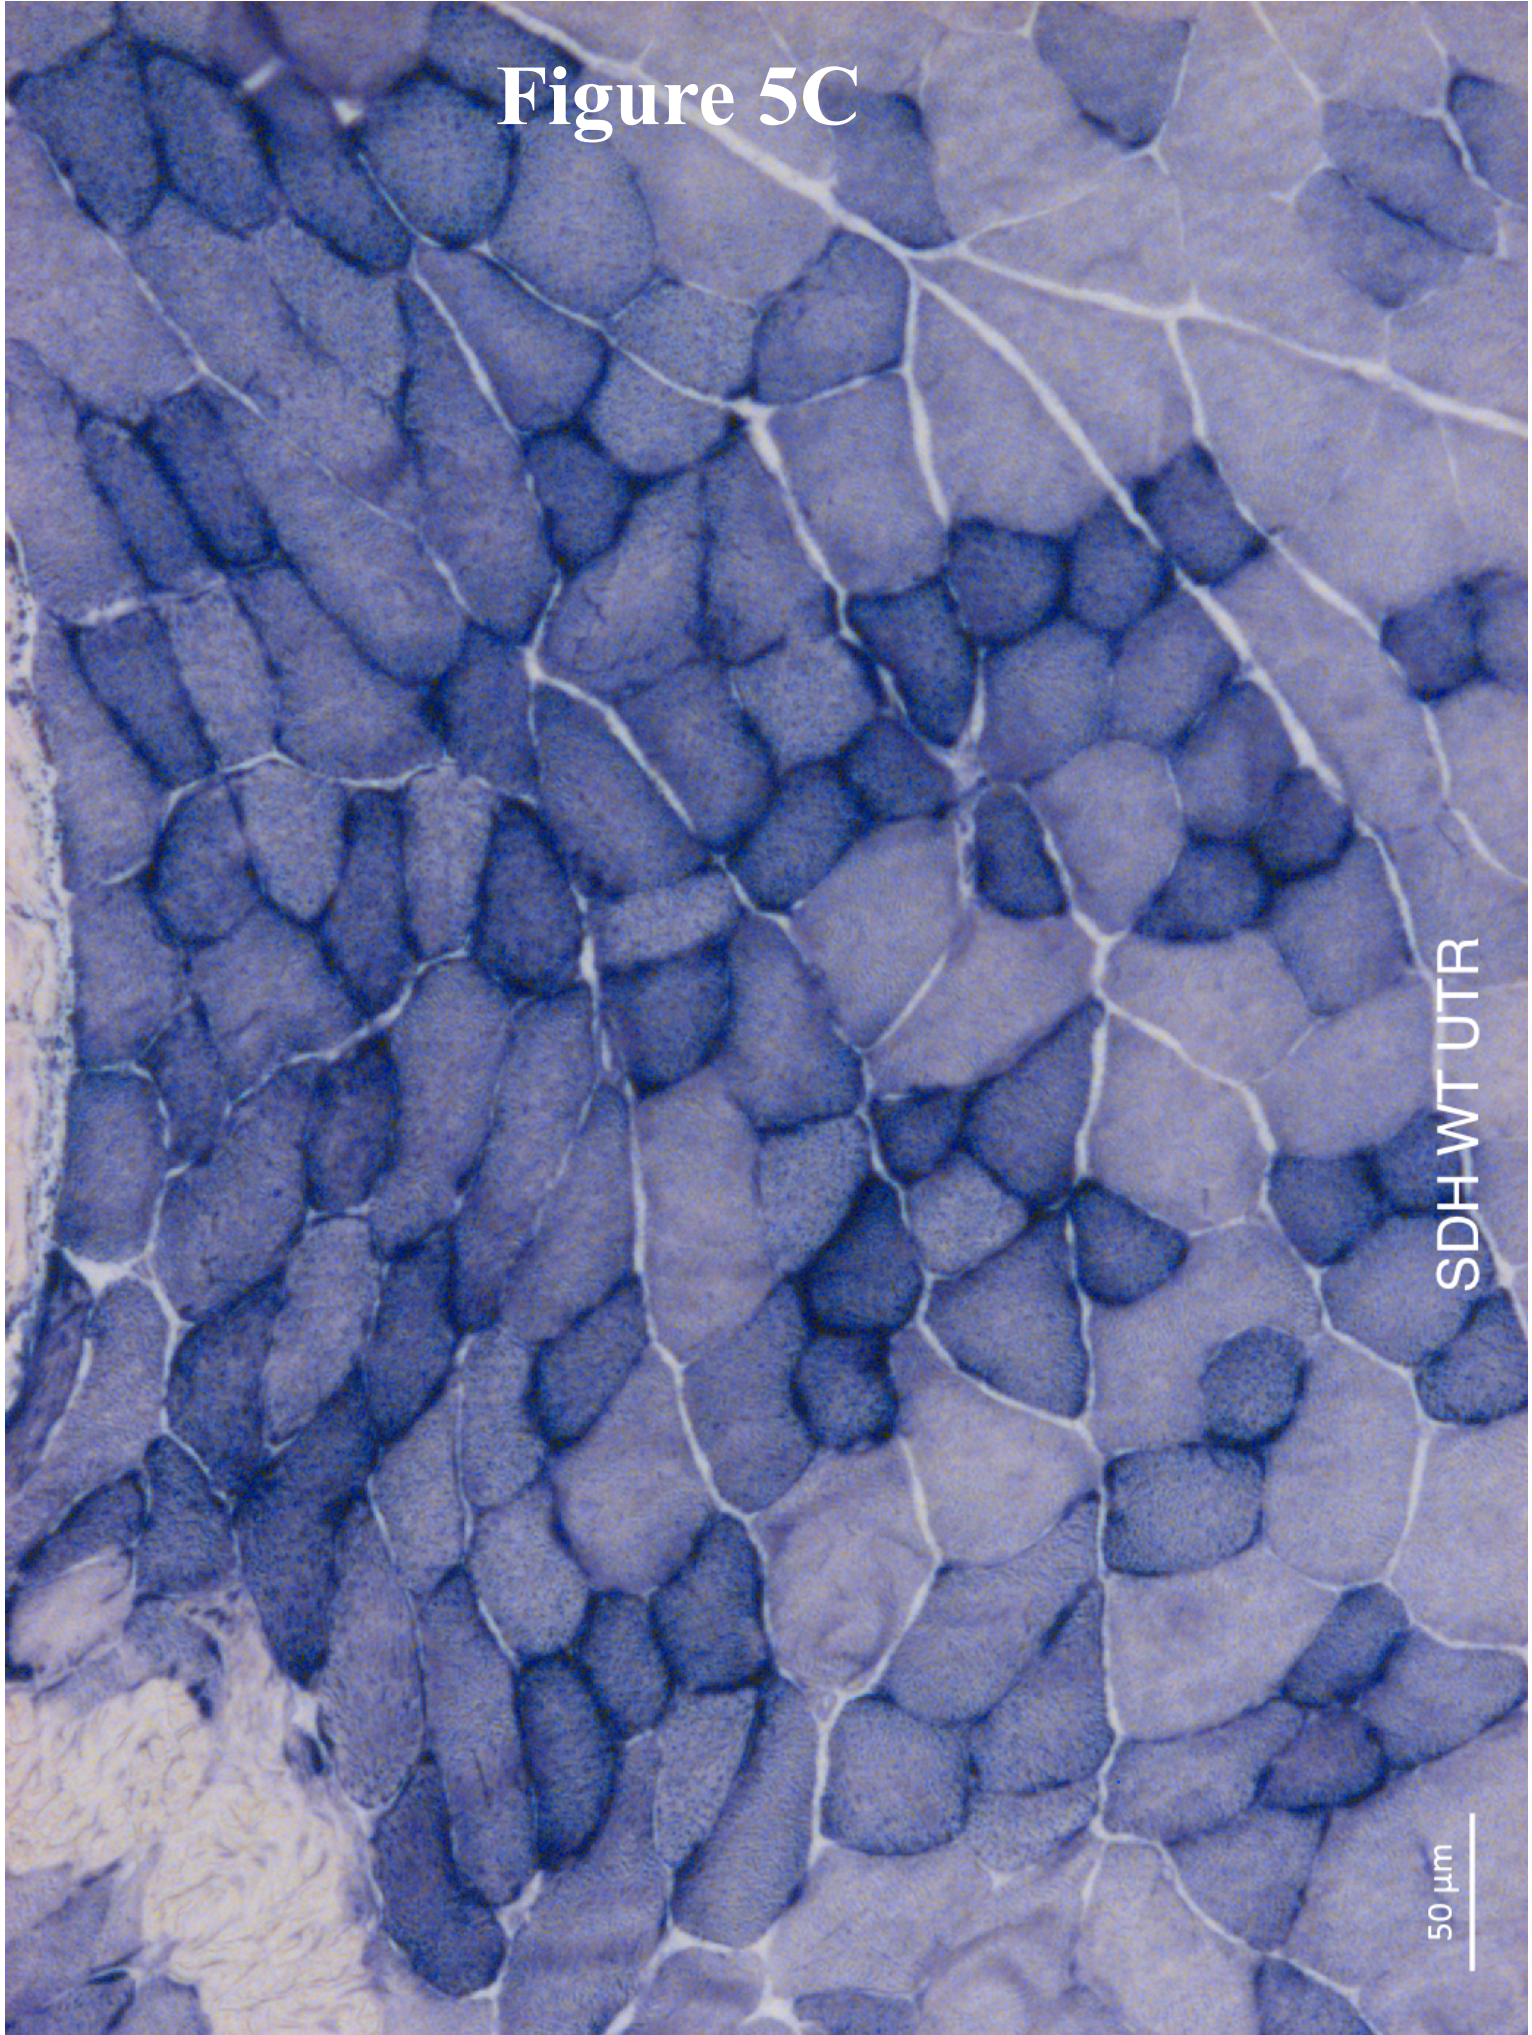

SDH-WT UTR

50 μm
